# Supplementary material
Source: Royal Society of Chemistry journal article supplement (doi:10.1039/d6cp01298a)
Supplement: d6cp01298a1.pdf [file d6cp01298a1.pdf]

## Supporting Document

### Computational Insights into Chlorine-dioxide Mediated Advance Oxidation Process of Halogenated Phenols

*Henry Gifta Evangeline<sup>a</sup>, Nelson Evangelin Nelcy<sup>a</sup>, Swaminathan Angeline Vedha<sup>a</sup>*

<sup>a</sup> PG & Research Department of Chemistry, Bishop Heber College Affiliated to Bharathidasan University,  
Tiruchirappalli – 620017, Tamil Nadu, India

email: [angeline.ch@bhc.edu.in](mailto:angeline.ch@bhc.edu.in)

#### Contents:

##### a) Figures:

S1: Step 1 IRC graph of ortho-chlorophenol

S2: P1 IRC of step2 for ortho-chlorophenol (B) P2 IRC of step 2 for ortho-chlorophenol

S3: (A) P1 IRC of step2 for ortho-chlorophenol (B) P2 IRC of step 2 for ortho chlorophenol

S4: Optimized structures of all the TS with selective bond lengths and bond angles.

S5: Bader's analysis - molecular graph and contour plot of TS1 geometries

S6: Bader's analysis - molecular graph, contour plot and NCI plot of (A) TS2 and (B) TS2' geometries

S7: Bader's analysis - molecular graph, contour plot and NCI plot of (A) TS3 and (B) TS3' geometries

##### b) Tables:

S1: Benchmark of para-chlorophenol at B3LYP, M06 and wB97XD and comparison with reported energy

S2: Gibbs free energy and enthalpy of ClO<sub>2</sub> and relevant by-products

S3: Gibbs free energy and enthalpy of all the species involved in the reaction

S4: Topological parameters computed at the BCP for TS1, TS2 and TS3

S5: Topological parameters computed at the BCP for TS2' and TS3'

S6: Coordinates of all the structures included in this study.

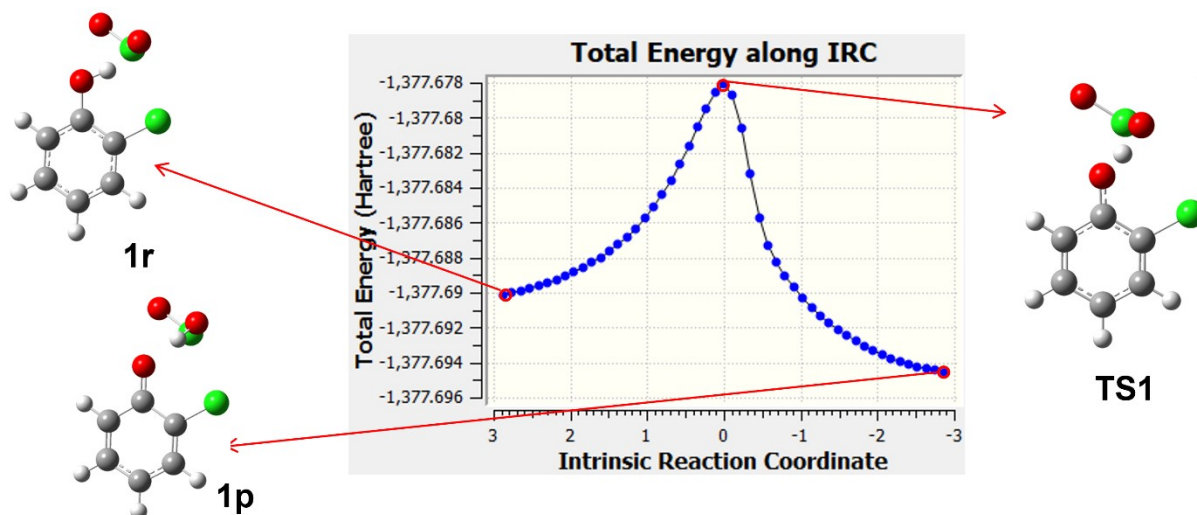

Figure S1: Step 1 IRC graph of ortho-chlorophenol computed at wB97XD /6-311g+(d,p) level of theory with IEFPCM solvent model (solvent=water)

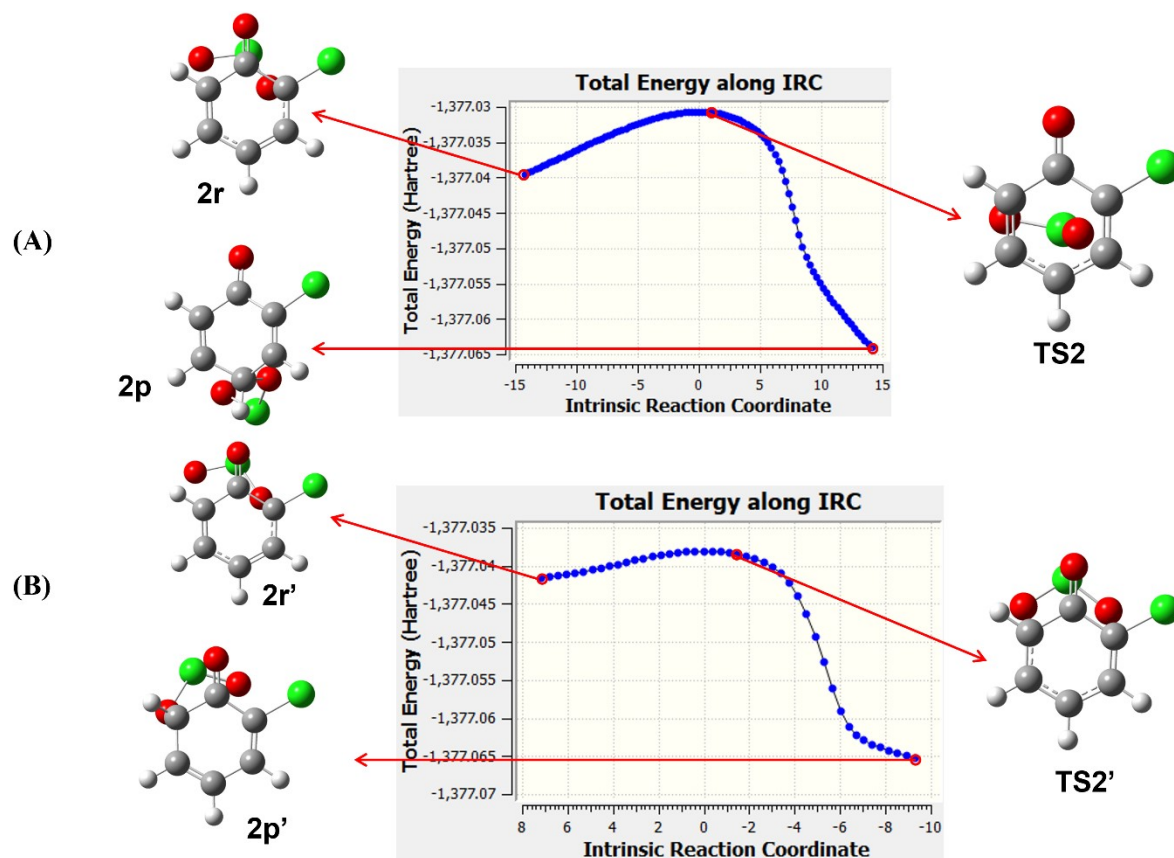

Figure S2: (A) P1 IRC of step 2 for ortho-chlorophenol (B) P2 IRC of step 2 for ortho-chlorophenol computed at wB97XD /6-311g+(d,p) level of theory with IEFPCM solvent model (solvent=water)

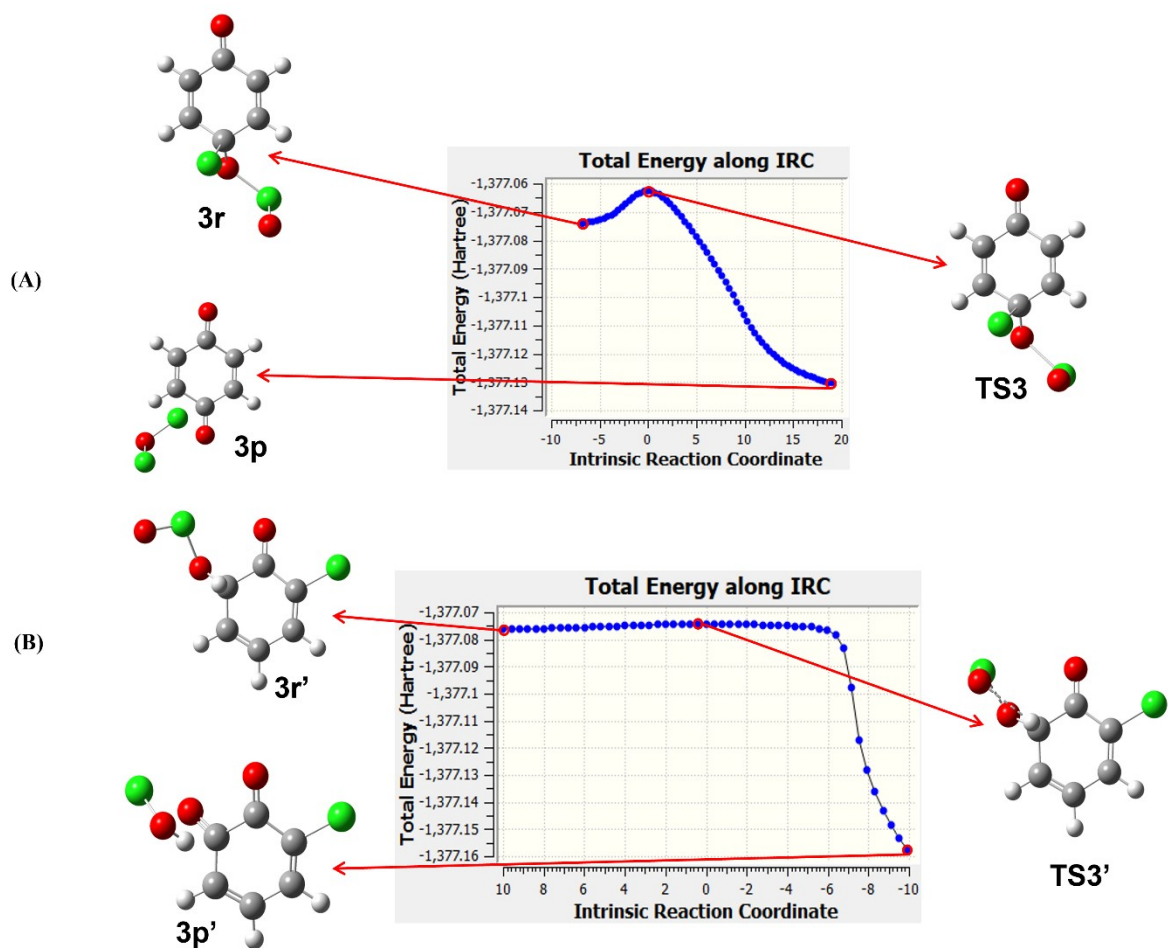

**Figure S3:** (A) P1 IRC of step2 for ortho-chlorophenol (B) P2 IRC of step 2 for ortho-chlorophenol computed at wB97XD6-311g+(d,p) level of theory with IEFPCM solvent model (solvent=water)

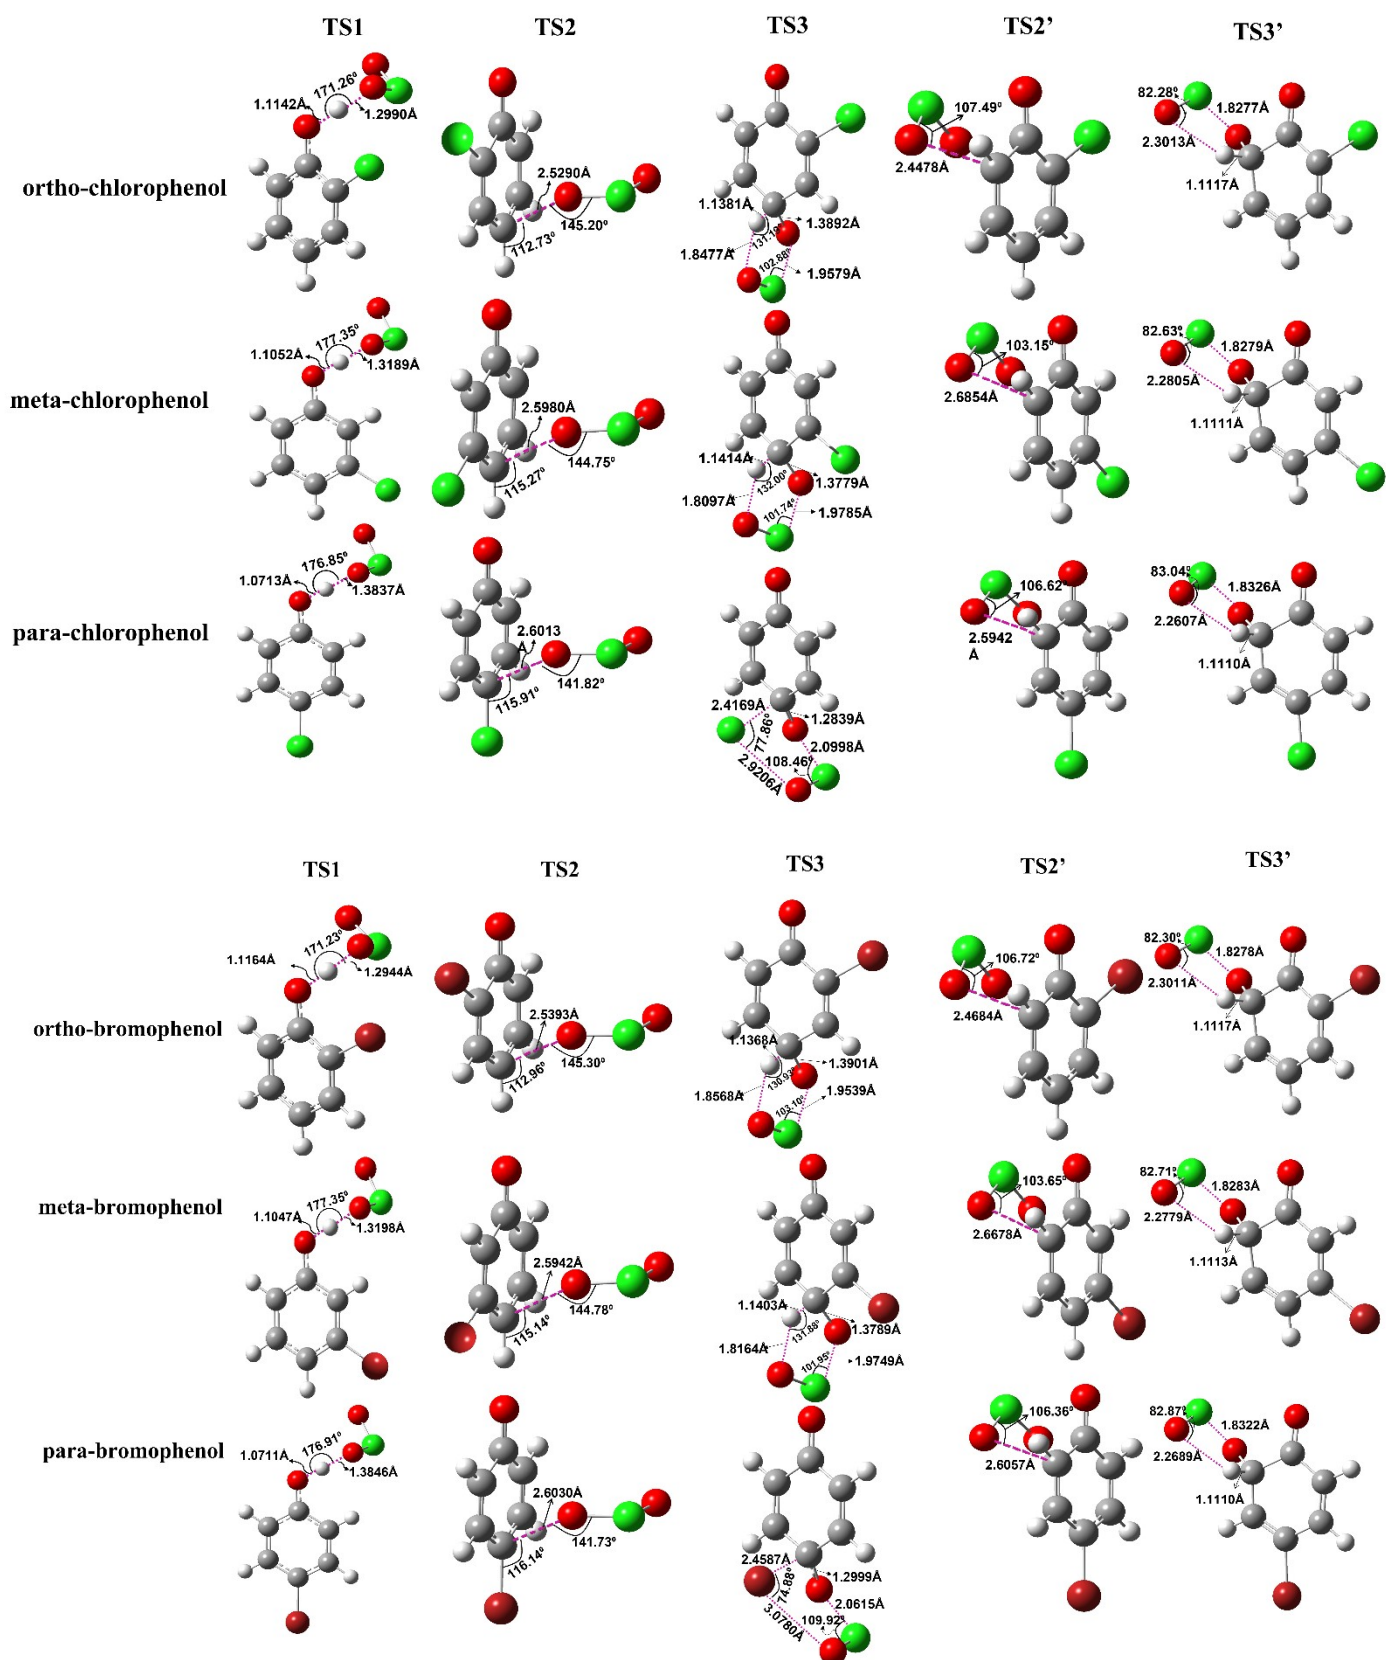

**Figure S4: Optimized structures of all the TS with selective bond lengths and bond angles, computed at *wB97XD/6-311g+(d,p)* level of theory with IEFPCM solvent model, solvent=water**

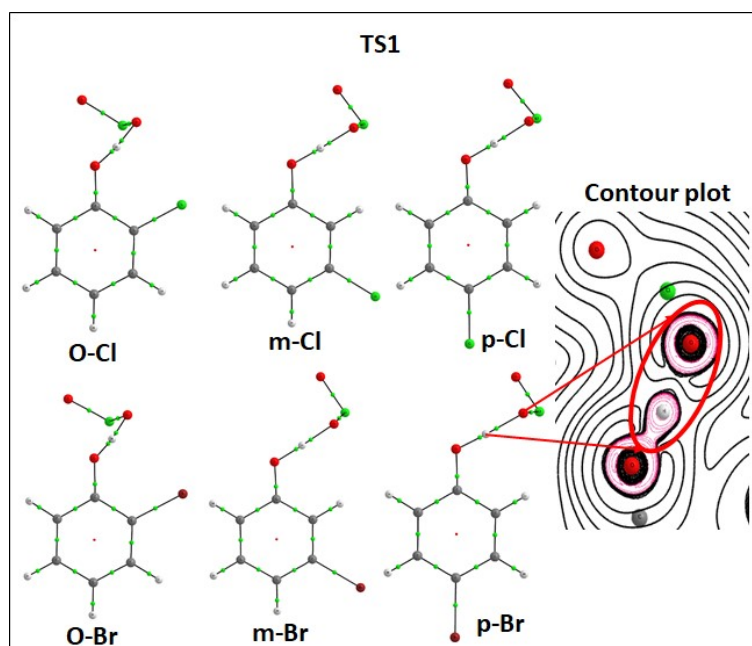

*Figure S5: Bader's analysis - molecular graph and contour plot of TS1 geometries*

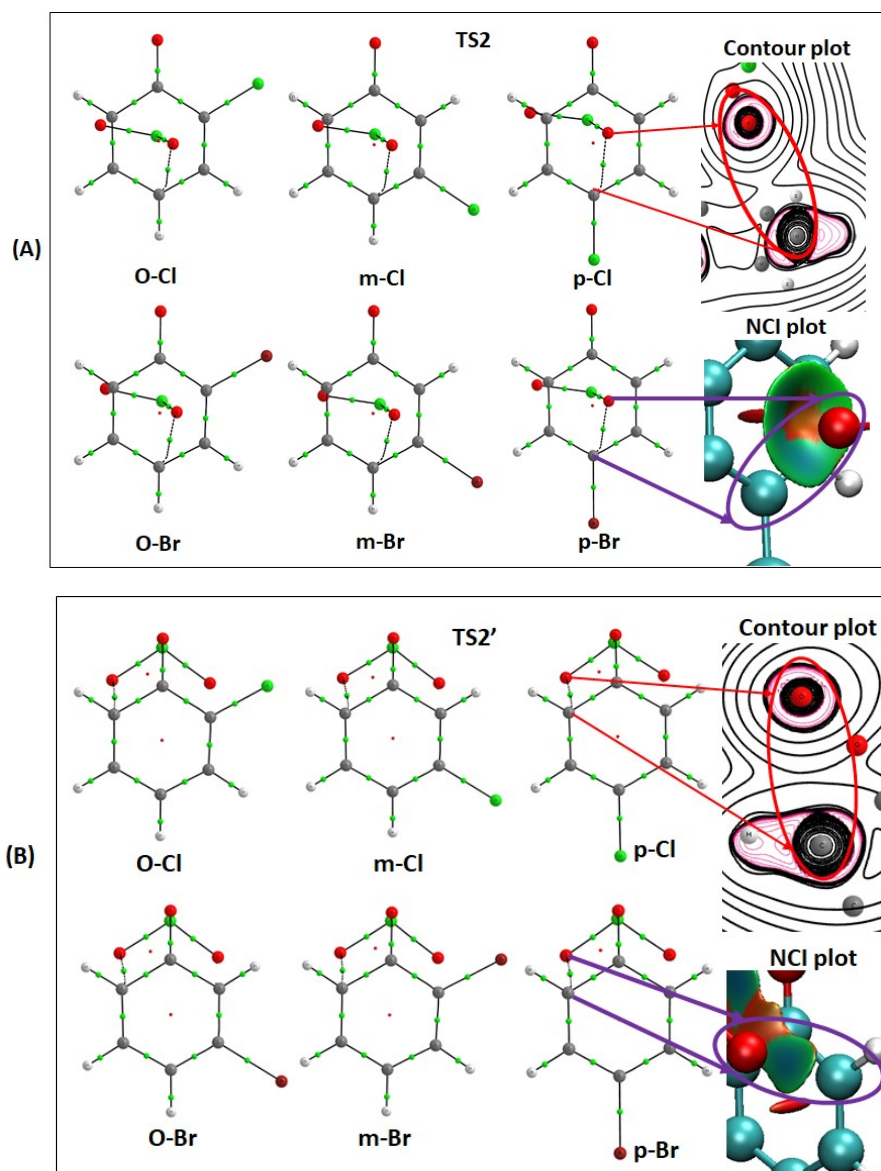

*Figure S6: Bader's analysis - molecular graph, contour plot and NCI plot of (A) TS2 and (B) TS2' geometries*

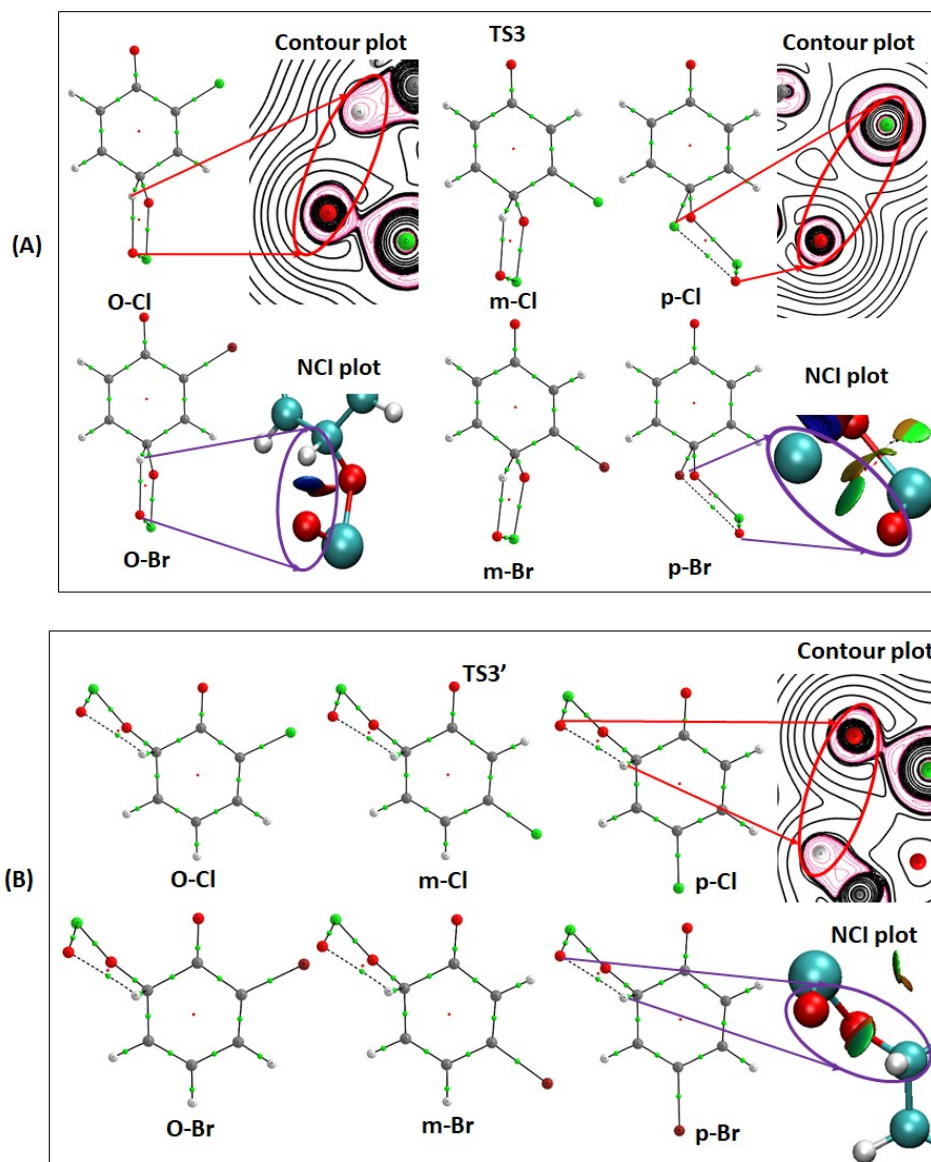

**Figure S7: Bader's analysis - molecular graph, contour plot and NCI plot of (A) TS3 and (B) TS3' geometries**

**Table S1: Total energies of reaction species of para-chlorophenol in (i) solvent=PCM, water B3LYP/6-322+G(d,p) and (ii) solvent=IEFPCM, water B3LYP/6-322+G(d,p), M06/6-322+G(d,p) and wB97XD/6-322+G(d,p)**

| compounds | Reported Values [6] at SCRF=PCM, B3LYP/6-311+G(d,p) | SCRF=PCM, B3LYP/6-311+G(d,p) | SCRF=IEFPCM, B3LYP/6-311+G(d,p) | SCRF=IEFPCM, M06/6-311+G(d,p) | SCRF=IEFPCM, wB97XD/6-311+G(d,p) |
|-----------|-----------------------------------------------------|------------------------------|---------------------------------|-------------------------------|----------------------------------|
| R         | -767.08591                                          | -767.09298                   | -767.09347                      | -766.837509                   | -766.96486                       |
| TS1       | -<br>1377.59255                                     | -<br>1377.58784              | -1377.58850                     | -1377.22304                   | -1377.37828                      |
| int1      | -766.46907                                          | -766.46325                   | -766.46316                      | -766.20793                    | -766.33068                       |
| TS2       | -<br>1376.95330                                     | -<br>1376.94456              | -1376.944564                    | -1376.58555                   | -1376.72966                      |
| int2      | -<br>1376.99527                                     | -<br>1376.98713              | -1376.98795                     | -1376.63505                   | -1376.78653                      |
| TS3       | -<br>1376.98363                                     | -<br>1376.97415              | -1376.97415                     | -1376.61443                   | -1376.75767                      |
| P         | -381.49366                                          | -381.48701                   | -381.48698                      | -381.23349                    | -381.34584                       |

Where, R=reactant (para chlorophenol), TS1=transition state 1, int1=first intermediate (phenoxide radical), TS2=transition state 2, int2=second intermediate (cyclohexadienone analogue), TS3=transition state 3, P=product (para benzoquinone)

**Table S2: Electronic energies with Gibbs free energy (EE + G) and enthalpy (EE + H) corrections for ClO<sub>2</sub> and relevant reaction by-products calculated at the wB97XD/6-311+G(d,p) level of theory (in Hartree)**

|                   | EE+G       | EE+H       |
|-------------------|------------|------------|
| ClO <sub>2</sub>  | -610.4465  | -610.4167  |
| HClO <sub>2</sub> | -611.0758  | -611.0454  |
| Cl <sub>2</sub> O | -995.5157  | -995.4854  |
| BrOCl             | -3109.4995 | -3109.4672 |
| HOCl              | -535.9759  | -535.9491  |

**Table S3:**  
**Electronic**  
**energies**  
**with Gibbs**  
**free energy**  
**(EE + G)**  
**and enthalpy**  
**(EE + H)**  
**corrections**  
**for all the**  
**reacting**  
**species**  
**calculated at**  
**the**  
**wB97XD/6-**  
**311+G(d,p)**  
**level of**  
**theory (in**  
**Hartree)**

| EE+G        |            |            |            |            |            |            |             |            |            |             |           |  |
|-------------|------------|------------|------------|------------|------------|------------|-------------|------------|------------|-------------|-----------|--|
| P1          |            |            |            |            |            |            |             |            |            |             |           |  |
|             | R          | TS1        | int1       | TS2        | int2       | TS3        | P           | TS2        | int2       | TS3         | P         |  |
|             |            |            |            |            |            |            |             |            |            |             |           |  |
| <b>o-Cl</b> | -766.9950  | -1377.4112 | -766.3615  | -1376.7648 | -1376.8246 | -1376.8206 | -840.9923   | -1376.7742 | -1376.8229 | -1376.8202  | -840.9846 |  |
| <b>o-Br</b> | -2880.9621 | -3491.3778 | -2880.3283 | -3490.7315 | -3490.7916 | -3490.7878 | -2954.9592  | -3490.7406 | -3490.7901 | -3490.78753 | -2954.95  |  |
| <b>m-Cl</b> | -766.9964  | -1377.4156 | -766.3602  | -1376.7606 | -1376.8262 | -1376.8221 | -840.9923   | -1376.7732 | -1376.8256 | -1376.82282 | -840.9863 |  |
| <b>m-Br</b> | -2880.9629 | -3491.3821 | -2880.3269 | -3490.7274 | -3490.7926 | -3490.7887 | -2954.9591  | -3490.74   | -3490.7917 | -3490.78905 | -2954.953 |  |
| <b>p-Cl</b> | -766.9961  | -1377.4188 | -766.3625  | -1376.7668 | -1376.8242 | -1376.7962 | -381.3766   | -1376.7778 | -1376.8231 | -1376.82035 | -840.9863 |  |
| <b>p-Br</b> | -2880.9628 | -3491.3853 | -2880.3289 | -3490.7328 | -3490.7909 | -3490.7697 | -381.3766   | -3490.7438 | -3490.7898 | -3490.78718 | -2954.953 |  |
|             |            |            |            |            |            |            |             |            |            |             |           |  |
| EE+H        |            |            |            |            |            |            |             |            |            |             |           |  |
| P1          |            |            |            |            |            |            |             |            |            |             |           |  |
|             | R          | TS1        | int1       | TS2        | int2       | TS3        | P           | TS2        | int2       | TS3         | P         |  |
|             |            |            |            |            |            |            |             |            |            |             |           |  |
| <b>o-Cl</b> | -766.9564  | -1377.3608 | -766.3224  | -1376.7159 | -1376.775  | -1376.773  | -840.951019 | -1376.7269 | -1376.7736 | -1376.77277 | -840.9425 |  |
| <b>o-Br</b> | -2880.922  | -3491.3255 | -2880.288  | -3490.6812 | -3490.741  | -3490.739  | -2954.9165  | -3490.692  | -3490.7395 | -3490.73865 | -2954.909 |  |
| <b>m-Cl</b> | -766.9576  | -1377.3659 | -766.321   | -1376.7118 | -1376.776  | -1376.775  | -840.950981 | -1376.7257 | -1376.7763 | -1376.77529 | -840.9443 |  |
| <b>m-Br</b> | -2880.923  | -3491.3311 | -2880.286  | -3490.6773 | -3490.742  | -3490.74   | -2954.91647 | -3490.6913 | -3490.7412 | -3490.74018 | -2954.909 |  |
| <b>p-Cl</b> | -766.9573  | -1377.3667 | -766.3233  | -1376.7185 | -1376.775  | -1376.746  | -381.338568 | -1376.7303 | -1376.7738 | -1376.7727  | -840.9443 |  |
| <b>p-Br</b> | -2880.923  | -3491.3319 | -2880.288  | -3490.6832 | -3490.741  | -3490.718  | -381.338568 | -3490.695  | -3490.7392 | -3490.7382  | -2954.909 |  |

**Table S4: Topological parameters at the BCP for TS1, TS2 and TS3 computed at the same level of theory**

| TS1  |     |            |        |                |        |         |         |        |
|------|-----|------------|--------|----------------|--------|---------|---------|--------|
|      | BCP | atoms      | $\rho$ | $\nabla^2\rho$ | G      | K       | V       | -(G/V) |
| o-Cl | 12  | O11 - H12  | 0.2185 | -0.8048        | 0.0892 | 0.2904  | -0.3797 | 0.2350 |
|      | 15  | H12 - O15  | 0.1307 | 0.0253         | 0.0848 | 0.0784  | -0.1632 | 0.5194 |
| m-Cl | 11  | O10 - H11  | 0.2284 | -0.9663        | 0.0868 | 0.3283  | -0.4151 | 0.2090 |
|      | 14  | H11 - O14  | 0.1236 | 0.0593         | 0.0844 | 0.0696  | -0.1539 | 0.5482 |
| p-Cl | 12  | O10 - H11  | 0.2531 | -1.3327        | 0.0808 | 0.4140  | -0.4949 | 0.1634 |
|      | 15  | H11 - O14  | 0.1033 | 0.1229         | 0.0762 | 0.0454  | -0.1216 | 0.6264 |
| o-Br | 12  | O11 - H12  | 0.2168 | -0.7719        | 0.0899 | 0.2829  | -0.3728 | 0.2412 |
|      | 15  | H12 - O15  | 0.1327 | 0.0165         | 0.0852 | 0.0810  | -0.1662 | 0.5124 |
| m-Br | 12  | O10 - H11  | 0.2287 | -0.9709        | 0.0867 | 0.3294  | -0.4161 | 0.2083 |
|      | 15  | H11 - O14  | 0.1233 | 0.0605         | 0.0843 | 0.0692  | -0.1534 | 0.5493 |
| p-Br | 10  | O9 - H10   | 0.2532 | -1.3355        | 0.0808 | 0.4147  | -0.4954 | 0.1630 |
|      | 13  | H10 - O13  | 0.1031 | 0.1233         | 0.0760 | 0.0452  | -0.1213 | 0.6271 |
| TS2  |     |            |        |                |        |         |         |        |
|      | BCP | atoms      | $\rho$ | $\nabla^2\rho$ | G      | K       | V       | -(G/V) |
| o-Cl | 12  | C6 - O12   | 0.0225 | 0.0814         | 0.0177 | -0.0026 | -0.0151 | 1.1723 |
| m-Cl | 9   | C6 - O11   | 0.0200 | 0.0772         | 0.0164 | -0.0029 | -0.0135 | 1.2146 |
| p-Cl | 10  | C6 - O10   | 0.0202 | 0.0727         | 0.0157 | -0.0025 | -0.0132 | 1.1879 |
| o-Br | 12  | C6 - O12   | 0.0220 | 0.0799         | 0.0174 | -0.0026 | -0.0148 | 1.1756 |
| m-Br | 11  | C6 - O11   | 0.0201 | 0.0764         | 0.0163 | -0.0028 | -0.0135 | 1.2081 |
| p-Br | 10  | C6 - O10   | 0.0201 | 0.0721         | 0.0156 | -0.0025 | -0.0131 | 1.1885 |
| TS3  |     |            |        |                |        |         |         |        |
|      | BCP | atoms      | $\rho$ | $\nabla^2\rho$ | G      | K       | V       | -(G/V) |
| o-Cl | 13  | C6 - O11   | 0.2706 | -0.3940        | 0.2730 | 0.3715  | -0.6445 | 0.4236 |
|      | 14  | O11 - Cl12 | 0.1142 | 0.2004         | 0.0753 | 0.0252  | -0.1004 | 0.7494 |
|      | 16  | O13 - H14  | 0.0385 | 0.1183         | 0.0283 | -0.0013 | -0.0271 | 1.0464 |
|      | 12  | C6 - H14   | 0.2490 | -0.7655        | 0.0347 | 0.2261  | -0.2609 | 0.1332 |
|      | 2   | RCP2       |        |                | 5.0000 | 0.0226  | 0.1238  |        |
| m-Cl | 11  | C6 - O10   | 0.2782 | -0.3955        | 0.2893 | 0.3882  | -0.6775 | 0.4270 |
|      | 12  | O10 - Cl11 | 0.1091 | 0.2034         | 0.0725 | 0.0216  | -0.0941 | 0.7703 |
|      | 14  | O12 - H13  | 0.0419 | 0.1251         | 0.0308 | -0.0005 | -0.0303 | 1.0160 |
|      | 10  | C6 - H13   | 0.2472 | -0.7541        | 0.0345 | 0.2230  | -0.2575 | 0.1339 |
|      | 2   | RCP2       |        |                | 5.0000 | 0.0232  | 0.1280  |        |
| p-Cl | 13  | C6 - O12   | 0.3458 | -0.3239        | 0.4593 | 0.5402  | -0.9995 | 0.4595 |
|      | 14  | O12 - Cl13 | 0.0812 | 0.2085         | 0.0589 | 0.0068  | -0.0656 | 0.8970 |
|      | 16  | O14 - Cl15 | 0.0155 | 0.0487         | 0.0105 | -0.0017 | -0.0088 | 1.1911 |
|      | 12  | C6 - Cl15  | 0.0467 | 0.0677         | 0.0228 | 0.0059  | -0.0287 | 0.7952 |
|      | 2   | RCP2       |        |                | 5.0000 | 0.0078  | 0.0349  |        |
| o-Br | 13  | C6 - O11   | 0.2699 | -0.3939        | 0.2715 | 0.3700  | -0.6416 | 0.4233 |
|      | 14  | O11 - Cl12 | 0.1152 | 0.1997         | 0.0758 | 0.0259  | -0.1017 | 0.7454 |
|      | 16  | O13 - H14  | 0.0378 | 0.1167         | 0.0278 | -0.0014 | -0.0263 | 1.0539 |
|      | 12  | C6 - H14   | 0.2499 | -0.7712        | 0.0347 | 0.2275  | -0.2622 | 0.1324 |
|      | 2   | RCP2       |        |                | 5.0000 | 0.0225  | 0.1228  |        |
| m-Br | 11  | C6 - O10   | 0.2775 | -0.3961        | 0.2876 | 0.3867  | -0.6743 | 0.4266 |
|      | 12  | O10 - Cl11 | 0.1100 | 0.2030         | 0.0729 | 0.0222  | -0.0951 | 0.7667 |
|      | 14  | O12 - H13  | 0.0412 | 0.1240         | 0.0303 | -0.0007 | -0.0297 | 1.0220 |
|      | 10  | C6 - H13   | 0.2480 | -0.7590        | 0.0345 | 0.2242  | -0.2587 | 0.1332 |
|      | 2   | RCP2       |        |                | 5.0000 | 0.0231  | 0.1274  |        |
| p-Br | 13  | O12 - Cl13 | 0.0886 | 0.2134         | 0.0635 | 0.0102  | -0.0737 | 0.8620 |

|  |    |            |        |         |        |         |         |        |
|--|----|------------|--------|---------|--------|---------|---------|--------|
|  | 15 | C6 - Br15  | 0.0525 | 0.0479  | 0.0213 | 0.0093  | -0.0306 | 0.6960 |
|  | 16 | O14 - Br15 | 0.0140 | 0.0394  | 0.0087 | -0.0011 | -0.0076 | 1.1447 |
|  | 12 | C6 - O12   | 0.3338 | -0.3693 | 0.4206 | 0.5129  | -0.9335 | 0.4505 |
|  | 2  | RCP2       |        |         | 5.0000 | 0.0075  | 0.0331  |        |

**Table S5: Topological parameters at the BCP for TS2' and TS3' computed at the same level of theory**

| TS2' |     |            |        |                |        |         |         |
|------|-----|------------|--------|----------------|--------|---------|---------|
|      | BCP | atoms      | $\rho$ | $\nabla^2\rho$ | G      | K       | V       |
| o-Cl | 10  | C6 - O10   | 0.0279 | 0.0770         | 0.0182 | -0.0010 | -0.0172 |
| m-Cl | 10  | C6 - O10   | 0.0182 | 0.0509         | 0.0114 | -0.0013 | -0.0102 |
| p-Cl | 9   | C6 - O9    | 0.0213 | 0.0604         | 0.0138 | -0.0013 | -0.0124 |
| o-Br | 9   | C6 - O9    | 0.0268 | 0.0744         | 0.0175 | -0.0011 | -0.0164 |
| m-Br | 9   | C6 - O9    | 0.0188 | 0.0526         | 0.0118 | -0.0013 | -0.0105 |
| p-Br | 9   | C6 - O9    | 0.0209 | 0.0592         | 0.0135 | -0.0013 | -0.0121 |
| TS3' |     |            |        |                |        |         |         |
|      | BCP | atoms      | $\rho$ | $\nabla^2\rho$ | G      | K       | V       |
| o-Cl | 10  | C6 - H9    | 0.2681 | -0.8818        | 0.0352 | 0.2556  | -0.2908 |
|      | 14  | H9 - O12   | 0.0159 | 0.0523         | 0.0115 | -0.0016 | -0.0099 |
|      | 12  | O10 - Cl11 | 0.1531 | 0.1452         | 0.0971 | 0.0608  | -0.1580 |
|      | 11  | C6 - O10   | 0.2532 | -0.4112        | 0.2287 | 0.3315  | -0.5601 |
| m-Cl | 10  | C6 - H9    | 0.2684 | -0.8837        | 0.0352 | 0.2561  | -0.2913 |
|      | 14  | H9 - O12   | 0.0165 | 0.0540         | 0.0119 | -0.0016 | -0.0102 |
|      | 12  | O10 - Cl11 | 0.1531 | 0.1450         | 0.0970 | 0.0607  | -0.1577 |
|      | 11  | C6 - O10   | 0.2522 | -0.4052        | 0.2282 | 0.3295  | -0.5577 |
| p-Cl | 10  | C6 - H8    | 0.2689 | -0.8871        | 0.0350 | 0.2568  | -0.2917 |
|      | 14  | H8 - O11   | 0.0171 | 0.0558         | 0.0122 | -0.0017 | -0.0105 |
|      | 12  | O9 - Cl10  | 0.1514 | 0.1485         | 0.0960 | 0.0589  | -0.1549 |
|      | 11  | C6 - O9    | 0.2522 | -0.4115        | 0.2262 | 0.3290  | -0.5552 |
| o-Br | 10  | C6 - H9    | 0.2681 | -0.8818        | 0.0352 | 0.2556  | -0.2908 |
|      | 14  | H9 - O12   | 0.0159 | 0.0523         | 0.0115 | -0.0016 | -0.0099 |
|      | 12  | O10 - Cl11 | 0.1531 | 0.1453         | 0.0971 | 0.0608  | -0.1579 |
|      | 11  | C6 - O10   | 0.2534 | -0.4107        | 0.2294 | 0.3320  | -0.5614 |
| m-Br | 11  | C6 - H9    | 0.2683 | -0.8828        | 0.0352 | 0.2559  | -0.2911 |
|      | 15  | H9 - O12   | 0.0166 | 0.0542         | 0.0119 | -0.0017 | -0.0103 |
|      | 13  | O10 - Cl11 | 0.1529 | 0.1453         | 0.0969 | 0.0606  | -0.1574 |
|      | 12  | C6 - O10   | 0.2522 | -0.4051        | 0.2284 | 0.3296  | -0.5580 |
| p-Br | 10  | C6 - H8    | 0.2688 | -0.8862        | 0.0350 | 0.2566  | -0.2916 |
|      | 14  | H8 - O11   | 0.0168 | 0.0550         | 0.0121 | -0.0017 | -0.0104 |
|      | 12  | O9 - Cl10  | 0.1515 | 0.1484         | 0.0962 | 0.0590  | -0.1552 |
|      | 11  | C6 - O9    | 0.2526 | -0.4113        | 0.2271 | 0.3300  | -0.5571 |

**Table S6: Coordinates of all the structures included in this study computed at wB97XD/6-311g+(d,p) level of theory with IEFPCM solvent model (solvent=water).**

ClO<sub>2</sub> Radical

|    |             |              |              |
|----|-------------|--------------|--------------|
| Cl | 0.000000000 | 0.046848000  | 0.360361000  |
| O  | 0.000000000 | -1.230983000 | -0.425222000 |
| O  | 0.000000000 | 1.308404000  | -0.451317000 |

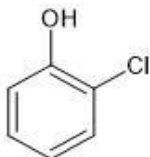

|    |              |              |              |
|----|--------------|--------------|--------------|
| C  | -1.826050000 | -1.281618000 | 0.012955000  |
| C  | -2.350224000 | 0.007886000  | -0.021693000 |
| C  | -1.510159000 | 1.111235000  | -0.017461000 |
| C  | -0.127246000 | 0.943692000  | 0.021589000  |
| C  | 0.385951000  | -0.354474000 | 0.056786000  |
| C  | -0.450182000 | -1.461913000 | 0.052470000  |
| H  | -3.422962000 | 0.158092000  | -0.053183000 |
| H  | -1.907661000 | 2.118942000  | -0.044709000 |
| O  | 0.650288000  | 2.049264000  | 0.023795000  |
| H  | 1.580649000  | 1.800123000  | 0.048382000  |
| H  | -2.481471000 | -2.143709000 | 0.009441000  |
| H  | -0.019174000 | -2.455058000 | 0.080520000  |
| Cl | 2.125460000  | -0.568288000 | 0.108175000  |

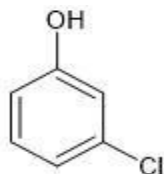

|    |              |              |              |
|----|--------------|--------------|--------------|
| C  | -1.838169000 | -1.286047000 | 0.012579000  |
| C  | -2.349193000 | 0.008109000  | -0.021669000 |
| C  | -1.510105000 | 1.112575000  | -0.017259000 |
| C  | -0.130118000 | 0.925792000  | 0.022043000  |
| C  | 0.407443000  | -0.359761000 | 0.057788000  |
| C  | -0.460983000 | -1.441849000 | 0.051964000  |
| H  | -3.422530000 | 0.154724000  | -0.053369000 |
| H  | -1.909941000 | 2.118796000  | -0.044615000 |
| O  | 0.652320000  | 2.034255000  | 0.023991000  |
| H  | 1.581402000  | 1.791520000  | 0.047997000  |
| H  | -2.492790000 | -2.147504000 | 0.008798000  |
| Cl | 0.215339000  | -3.059165000 | 0.096666000  |
| H  | 1.479801000  | -0.513768000 | 0.090386000  |

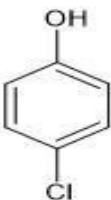

|   |              |              |              |
|---|--------------|--------------|--------------|
| C | -1.821917000 | -1.265785000 | 0.012813000  |
| C | -2.359904000 | 0.013318000  | -0.021940000 |
| C | -1.510882000 | 1.111205000  | -0.017254000 |
| C | -0.131186000 | 0.926309000  | 0.021951000  |

|    |              |              |              |
|----|--------------|--------------|--------------|
| C  | 0.398265000  | -0.361849000 | 0.057575000  |
| C  | -0.449641000 | -1.462237000 | 0.052714000  |
| H  | -3.432764000 | 0.157406000  | -0.053545000 |
| H  | -1.914850000 | 2.115989000  | -0.044732000 |
| O  | 0.649375000  | 2.038017000  | 0.023726000  |
| H  | 1.577906000  | 1.793466000  | 0.047751000  |
| H  | 1.472062000  | -0.512687000 | 0.090121000  |
| H  | -0.038451000 | -2.463707000 | 0.080403000  |
| Cl | -2.893773000 | -2.656626000 | 0.006236000  |

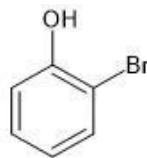

|    |              |              |              |
|----|--------------|--------------|--------------|
| C  | -1.824525000 | -1.279656000 | 0.013543000  |
| C  | -2.349372000 | 0.009581000  | -0.022007000 |
| C  | -1.509683000 | 1.112571000  | -0.018045000 |
| C  | -0.125792000 | 0.946384000  | 0.021423000  |
| C  | 0.389530000  | -0.351521000 | 0.056243000  |
| C  | -0.448630000 | -1.459268000 | 0.052737000  |
| H  | -3.422163000 | 0.159561000  | -0.053853000 |
| H  | -1.907445000 | 2.120208000  | -0.045780000 |
| O  | 0.644085000  | 2.056954000  | 0.023843000  |
| H  | 1.576373000  | 1.812010000  | 0.051380000  |
| H  | -2.479253000 | -2.142374000 | 0.010753000  |
| Br | 2.278611000  | -0.588857000 | 0.109534000  |
| H  | -0.022560000 | -2.454430000 | 0.081069000  |

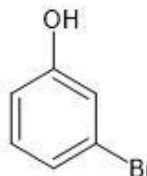

|    |              |              |              |
|----|--------------|--------------|--------------|
| C  | -1.837422000 | -1.285903000 | 0.012498000  |
| C  | -2.348343000 | 0.008573000  | -0.021683000 |
| C  | -1.509277000 | 1.113149000  | -0.017212000 |
| C  | -0.129464000 | 0.926583000  | 0.022007000  |
| C  | 0.408257000  | -0.359236000 | 0.057670000  |
| C  | -0.459539000 | -1.442493000 | 0.051912000  |
| H  | -3.421809000 | 0.155039000  | -0.053330000 |
| H  | -1.909314000 | 2.119293000  | -0.044458000 |
| O  | 0.653270000  | 2.034926000  | 0.023987000  |
| H  | 1.582279000  | 1.791890000  | 0.048159000  |
| H  | 1.481351000  | -0.507752000 | 0.090115000  |
| H  | -2.496431000 | -2.144158000 | 0.008579000  |
| Br | 0.275692000  | -3.199547000 | 0.100909000  |

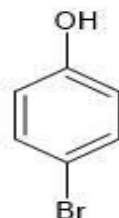

|    |              |              |              |
|----|--------------|--------------|--------------|
| C  | -1.82302000  | -1.267631000 | 0.012816000  |
| C  | -2.360181000 | 0.012695000  | -0.021932000 |
| C  | -1.511057000 | 1.110810000  | -0.017261000 |
| C  | -0.131347000 | 0.926161000  | 0.021934000  |
| C  | 0.398192000  | -0.361967000 | 0.057563000  |
| C  | -0.449536000 | -1.462716000 | 0.052720000  |
| H  | -3.432326000 | 0.161617000  | -0.053564000 |
| H  | -1.915257000 | 2.115532000  | -0.044757000 |
| O  | 0.648819000  | 2.037477000  | 0.023666000  |
| H  | 1.577493000  | 1.793357000  | 0.047796000  |
| H  | 1.472099000  | -0.512637000 | 0.090098000  |
| H  | -0.033421000 | -2.462157000 | 0.080535000  |
| Br | -2.986718000 | -2.777345000 | 0.005779000  |

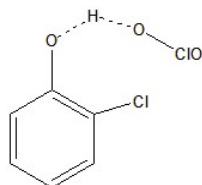

|    |              |              |              |
|----|--------------|--------------|--------------|
| C  | -2.385675000 | 1.559889000  | -0.523554000 |
| C  | -1.271644000 | 0.862822000  | -0.955344000 |
| C  | -1.010623000 | -0.470159000 | -0.486992000 |
| C  | -1.942755000 | -1.050669000 | 0.420081000  |
| C  | -3.053704000 | -0.352900000 | 0.832456000  |
| C  | -3.276152000 | 0.958195000  | 0.368931000  |
| H  | -2.567264000 | 2.562495000  | -0.887834000 |
| H  | -1.736916000 | -2.055720000 | 0.766349000  |
| H  | -3.756097000 | -0.806218000 | 1.520550000  |
| H  | -4.147568000 | 1.509404000  | 0.699628000  |
| O  | 0.007861000  | -1.179097000 | -0.884221000 |
| H  | 1.019201000  | -0.711501000 | -0.885501000 |
| Cl | 2.746598000  | -0.033877000 | 0.746557000  |
| O  | 3.166158000  | -1.334148000 | 1.505443000  |
| O  | 2.250950000  | -0.315934000 | -0.768536000 |
| Cl | -0.190386000 | 1.579273000  | -2.110115000 |

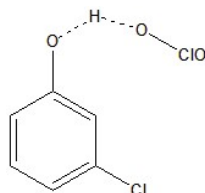

|    |              |              |              |
|----|--------------|--------------|--------------|
| C  | -2.234904000 | 1.504150000  | -0.295238000 |
| C  | -1.094029000 | 0.802788000  | -0.599278000 |
| C  | -1.040914000 | -0.586970000 | -0.277862000 |
| C  | -2.159513000 | -1.215054000 | 0.354330000  |
| C  | -3.291507000 | -0.480197000 | 0.628876000  |
| C  | -3.346727000 | 0.885639000  | 0.314076000  |
| H  | -2.086904000 | -2.268034000 | 0.593658000  |
| H  | -4.146708000 | -0.949556000 | 1.098061000  |
| H  | -4.230470000 | 1.467693000  | 0.539143000  |
| O  | -0.007793000 | -1.321314000 | -0.567800000 |
| H  | 0.928107000  | -0.768203000 | -0.766585000 |
| Cl | 2.882062000  | 0.406402000  | 0.308773000  |

|    |              |              |              |
|----|--------------|--------------|--------------|
| O  | 3.697546000  | -0.716508000 | 1.046892000  |
| O  | 2.076265000  | -0.158315000 | -0.988478000 |
| H  | -0.243670000 | 1.275089000  | -1.072230000 |
| Cl | -2.334349000 | 3.208976000  | -0.672231000 |

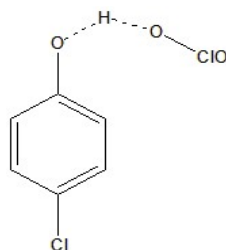

|    |              |              |              |
|----|--------------|--------------|--------------|
| C  | -2.190441000 | 1.547876000  | -0.249030000 |
| C  | -1.075047000 | 0.803131000  | -0.550694000 |
| C  | -1.052899000 | -0.595122000 | -0.264632000 |
| C  | -2.188707000 | -1.205600000 | 0.343644000  |
| C  | -3.304363000 | -0.457775000 | 0.631426000  |
| C  | -3.304750000 | 0.919447000  | 0.337855000  |
| H  | -2.219161000 | 2.608596000  | -0.460191000 |
| H  | -2.151121000 | -2.265393000 | 0.560725000  |
| H  | -4.175148000 | -0.913083000 | 1.084030000  |
| O  | -0.032951000 | -1.353353000 | -0.562285000 |
| H  | 0.875059000  | -0.823091000 | -0.767277000 |
| Cl | 2.910835000  | 0.368469000  | 0.278984000  |
| O  | 3.714215000  | -0.761110000 | 1.026868000  |
| O  | 2.086065000  | -0.195225000 | -0.999514000 |
| H  | -0.207003000 | 1.263273000  | -1.005079000 |
| Cl | -4.706825000 | 1.863405000  | 0.712872000  |

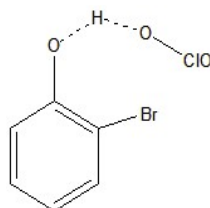

|    |              |              |              |
|----|--------------|--------------|--------------|
| C  | -2.439108000 | 0.481612000  | -0.790323000 |
| C  | -1.383526000 | -0.012670000 | -0.043295000 |
| C  | -0.542491000 | 0.870754000  | 0.714550000  |
| C  | -0.844911000 | 2.262679000  | 0.685708000  |
| C  | -1.903734000 | 2.741464000  | -0.050174000 |
| C  | -2.700977000 | 1.854024000  | -0.797303000 |
| H  | -3.065713000 | -0.194616000 | -1.356622000 |
| H  | -0.205298000 | 2.919702000  | 1.261769000  |
| H  | -2.121746000 | 3.802022000  | -0.063053000 |
| H  | -3.530841000 | 2.231322000  | -1.381868000 |
| O  | 0.448909000  | 0.457292000  | 1.454842000  |
| H  | 1.229914000  | -0.183609000 | 0.979951000  |
| Cl | 2.973268000  | 0.082176000  | -0.723415000 |
| O  | 3.975839000  | 1.148316000  | -0.179980000 |
| O  | 2.254984000  | -0.770321000 | 0.450249000  |
| Br | -1.068607000 | -1.881180000 | 0.021201000  |

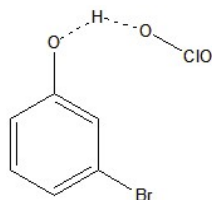

|    |              |              |              |
|----|--------------|--------------|--------------|
| C  | -2.235830000 | 1.504540000  | -0.295919000 |
| C  | -1.094418000 | 0.803289000  | -0.598689000 |
| C  | -1.040828000 | -0.587152000 | -0.276877000 |
| C  | -2.159409000 | -1.215281000 | 0.354657000  |
| C  | -3.291562000 | -0.480737000 | 0.628580000  |
| C  | -3.347600000 | 0.885763000  | 0.313599000  |
| H  | -2.086861000 | -2.268279000 | 0.594118000  |
| H  | -4.146937000 | -0.950223000 | 1.097573000  |
| H  | -4.233624000 | 1.463295000  | 0.540492000  |
| O  | -0.007058000 | -1.321020000 | -0.566213000 |
| H  | 0.928109000  | -0.767725000 | -0.765386000 |
| Cl | 2.884546000  | 0.405447000  | 0.308814000  |
| O  | 3.699420000  | -0.719572000 | 1.044765000  |
| O  | 2.076569000  | -0.156817000 | -0.988219000 |
| H  | -0.241395000 | 1.270993000  | -1.071247000 |
| Br | -2.345127000 | 3.364668000  | -0.707972000 |

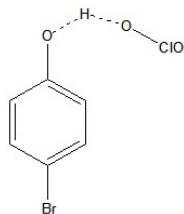

|    |              |              |              |
|----|--------------|--------------|--------------|
| C  | -2.191279000 | 1.547244000  | -0.246704000 |
| C  | -1.075632000 | 0.801203000  | -0.546248000 |
| C  | -1.053132000 | -0.595989000 | -0.256460000 |
| C  | -2.188500000 | -1.204354000 | 0.354108000  |
| C  | -3.304544000 | -0.455854000 | 0.640647000  |
| C  | -3.306062000 | 0.921052000  | 0.343046000  |
| H  | -2.151057000 | -2.263584000 | 0.574416000  |
| H  | -4.172170000 | -0.914781000 | 1.095262000  |
| O  | -0.033312000 | -1.355099000 | -0.552163000 |
| H  | 0.873049000  | -0.825311000 | -0.764723000 |
| Cl | 2.920059000  | 0.364594000  | 0.262576000  |
| O  | 3.726921000  | -0.767951000 | 1.003794000  |
| O  | 2.082528000  | -0.197247000 | -1.009292000 |
| H  | -0.207666000 | 1.260295000  | -1.002064000 |
| H  | -2.215126000 | 2.606931000  | -0.462892000 |
| Br | -4.833924000 | 1.951782000  | 0.751448000  |

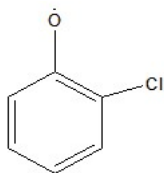

|   |              |              |             |
|---|--------------|--------------|-------------|
| C | -0.708223000 | -1.417505000 | 0.073231000 |
| C | -0.057182000 | -0.208331000 | 0.085647000 |
| C | -0.788802000 | 1.058593000  | 0.040666000 |

|    |              |              |              |
|----|--------------|--------------|--------------|
| C  | -2.235041000 | 0.952933000  | -0.017222000 |
| C  | -2.861954000 | -0.260262000 | -0.028821000 |
| C  | -2.106374000 | -1.449462000 | 0.015810000  |
| H  | -2.787903000 | 1.884305000  | -0.051065000 |
| H  | -3.942683000 | -0.318092000 | -0.073565000 |
| H  | -2.610952000 | -2.407795000 | 0.005950000  |
| O  | -0.212905000 | 2.156630000  | 0.050832000  |
| H  | -0.144448000 | -2.341244000 | 0.107288000  |
| Cl | 1.666960000  | -0.141346000 | 0.156040000  |

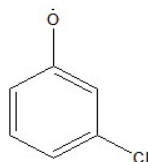

|    |              |              |              |
|----|--------------|--------------|--------------|
| C  | -0.716150000 | -1.399053000 | 0.072721000  |
| C  | -0.045253000 | -0.210419000 | 0.086294000  |
| C  | -0.789502000 | 1.035429000  | 0.041050000  |
| C  | -2.236051000 | 0.952947000  | -0.017419000 |
| C  | -2.865353000 | -0.264803000 | -0.029018000 |
| C  | -2.122234000 | -1.454281000 | 0.015119000  |
| H  | -2.790157000 | 1.883225000  | -0.051373000 |
| H  | -3.945837000 | -0.324489000 | -0.073658000 |
| H  | -2.623108000 | -2.413891000 | 0.005392000  |
| O  | -0.199219000 | 2.132572000  | 0.052067000  |
| Cl | 0.171161000  | -2.903267000 | 0.126780000  |
| H  | 1.035251000  | -0.158768000 | 0.130989000  |

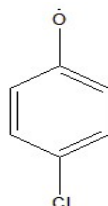

|    |              |              |              |
|----|--------------|--------------|--------------|
| C  | -0.707154000 | -1.417681000 | 0.073338000  |
| C  | -0.057477000 | -0.214956000 | 0.085841000  |
| C  | -0.791573000 | 1.035793000  | 0.041707000  |
| C  | -2.239005000 | 0.950542000  | -0.017511000 |
| C  | -2.876147000 | -0.258717000 | -0.029469000 |
| C  | -2.112997000 | -1.440314000 | 0.015557000  |
| H  | -2.797399000 | 1.878451000  | -0.051801000 |
| H  | -3.956175000 | -0.320968000 | -0.074123000 |
| O  | -0.204690000 | 2.135074000  | 0.051145000  |
| H  | 1.023919000  | -0.163509000 | 0.130487000  |
| H  | -0.157592000 | -2.349966000 | 0.107176000  |
| Cl | -2.928354000 | -2.965212000 | -0.000598000 |

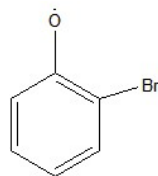

|   |              |              |             |
|---|--------------|--------------|-------------|
| C | -0.707260000 | -1.412994000 | 0.073297000 |
| C | -0.054650000 | -0.204088000 | 0.085360000 |

|    |              |              |              |
|----|--------------|--------------|--------------|
| C  | -0.788681000 | 1.061679000  | 0.041035000  |
| C  | -2.235673000 | 0.954262000  | -0.017715000 |
| C  | -2.862746000 | -0.258936000 | -0.029153000 |
| C  | -2.106186000 | -1.446811000 | 0.016143000  |
| H  | -2.788557000 | 1.885627000  | -0.051966000 |
| H  | -3.943470000 | -0.317133000 | -0.074218000 |
| O  | -0.219709000 | 2.163158000  | 0.052617000  |
| H  | -2.609332000 | -2.406038000 | 0.006970000  |
| H  | -0.147778000 | -2.339439000 | 0.107273000  |
| Br | 1.822416000  | -0.134035000 | 0.160599000  |

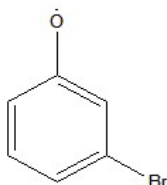

|    |              |              |              |
|----|--------------|--------------|--------------|
| C  | -0.714914000 | -1.400311000 | 0.072836000  |
| C  | -0.045116000 | -0.210049000 | 0.086404000  |
| C  | -0.789260000 | 1.036476000  | 0.040920000  |
| C  | -2.235787000 | 0.954599000  | -0.017541000 |
| C  | -2.863762000 | -0.263108000 | -0.028973000 |
| C  | -2.120714000 | -1.454073000 | 0.015278000  |
| H  | -2.790229000 | 1.884574000  | -0.051613000 |
| H  | -3.944299000 | -0.324888000 | -0.073628000 |
| O  | -0.197736000 | 2.133000000  | 0.052266000  |
| H  | 1.035244000  | -0.152604000 | 0.131159000  |
| Br | 0.252430000  | -3.034701000 | 0.131065000  |
| H  | -2.628193000 | -2.410152000 | 0.005512000  |

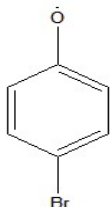

|    |              |              |              |
|----|--------------|--------------|--------------|
| C  | -0.707653000 | -1.417802000 | 0.073267000  |
| C  | -0.057701000 | -0.215008000 | 0.085776000  |
| C  | -0.791524000 | 1.035872000  | 0.040577000  |
| C  | -2.238794000 | 0.950183000  | -0.017662000 |
| C  | -2.876406000 | -0.259222000 | -0.029507000 |
| C  | -2.114562000 | -1.442738000 | 0.015299000  |
| H  | -2.797379000 | 1.878122000  | -0.051587000 |
| H  | -3.956766000 | -0.314997000 | -0.073916000 |
| O  | -0.204769000 | 2.135001000  | 0.051683000  |
| H  | 1.023745000  | -0.163887000 | 0.130838000  |
| H  | -0.153527000 | -2.347209000 | 0.107418000  |
| Br | -3.000280000 | -3.101918000 | -0.001751000 |

#### HClO<sub>2</sub>

|    |              |              |              |
|----|--------------|--------------|--------------|
| Cl | -0.089170000 | -0.483260000 | 0.011866000  |
| O  | -1.260088000 | 0.512246000  | -0.005394000 |
| O  | 1.400034000  | 0.331369000  | -0.115546000 |

|   |             |             |             |
|---|-------------|-------------|-------------|
| H | 1.630647000 | 0.604271000 | 0.785125000 |
|---|-------------|-------------|-------------|

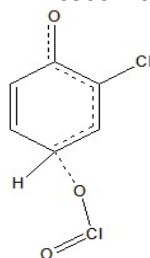

|    |              |              |              |
|----|--------------|--------------|--------------|
| C  | 1.539641000  | -1.370247000 | -0.846680000 |
| C  | 1.695287000  | -0.051408000 | -1.144189000 |
| C  | 1.462282000  | 1.018170000  | -0.111149000 |
| C  | 1.103063000  | 0.548611000  | 1.240547000  |
| C  | 0.883393000  | -0.756861000 | 1.475345000  |
| C  | 0.983185000  | -1.697362000 | 0.399409000  |
| H  | 1.704206000  | -2.137442000 | -1.590957000 |
| H  | 1.014842000  | 1.308373000  | 2.006683000  |
| H  | 0.581637000  | -1.111935000 | 2.452030000  |
| H  | 0.727894000  | -2.733181000 | 0.591013000  |
| O  | 1.597634000  | 2.193789000  | -0.374693000 |
| O  | -0.795534000 | -0.480317000 | -0.687948000 |
| Cl | -2.254437000 | 0.002103000  | -0.329382000 |
| O  | -2.322285000 | 0.630169000  | 1.090091000  |
| Cl | 2.213905000  | 0.464516000  | -2.685103000 |

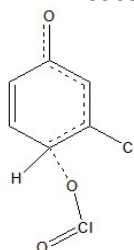

|    |              |              |              |
|----|--------------|--------------|--------------|
| C  | 1.522828000  | -1.355590000 | -0.839436000 |
| C  | 1.702513000  | -0.052489000 | -1.155330000 |
| C  | 1.457485000  | 0.992505000  | -0.135132000 |
| C  | 1.052400000  | 0.549423000  | 1.214974000  |
| C  | 0.843113000  | -0.762040000 | 1.463825000  |
| C  | 0.962872000  | -1.707351000 | 0.412310000  |
| H  | 0.942041000  | 1.313571000  | 1.973642000  |
| H  | 0.517057000  | -1.107548000 | 2.435754000  |
| H  | 0.718620000  | -2.746049000 | 0.601958000  |
| O  | 1.614602000  | 2.171618000  | -0.401888000 |
| O  | -0.818707000 | -0.453859000 | -0.752342000 |
| Cl | -2.219118000 | 0.058890000  | -0.266033000 |
| O  | -2.161017000 | 0.550986000  | 1.199726000  |
| Cl | 1.811371000  | -2.612260000 | -2.003099000 |
| H  | 2.045385000  | 0.273668000  | -2.129192000 |

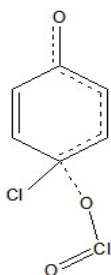

|    |              |              |              |
|----|--------------|--------------|--------------|
| C  | 1.540827000  | -1.370836000 | -0.846956000 |
| C  | 1.728434000  | -0.066138000 | -1.141738000 |
| C  | 1.467864000  | 0.991213000  | -0.138184000 |
| C  | 1.051441000  | 0.553365000  | 1.211726000  |
| C  | 0.830864000  | -0.748734000 | 1.472605000  |
| C  | 0.965969000  | -1.695375000 | 0.411056000  |
| H  | 0.936351000  | 1.318407000  | 1.969031000  |
| H  | 0.500769000  | -1.092383000 | 2.443619000  |
| O  | 1.629631000  | 2.169388000  | -0.403605000 |
| O  | -0.819676000 | -0.418465000 | -0.755053000 |
| Cl | -2.248355000 | 0.023703000  | -0.258057000 |
| O  | -2.212716000 | 0.507363000  | 1.220281000  |
| H  | 2.099732000  | 0.253945000  | -2.107767000 |
| H  | 1.723921000  | -2.155472000 | -1.568753000 |
| Cl | 0.576476000  | -3.317621000 | 0.734190000  |

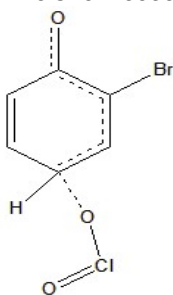

|    |              |              |              |
|----|--------------|--------------|--------------|
| C  | 1.538978000  | -1.364962000 | -0.847312000 |
| C  | 1.698599000  | -0.046549000 | -1.146301000 |
| C  | 1.462610000  | 1.020093000  | -0.112389000 |
| C  | 1.101009000  | 0.548686000  | 1.239258000  |
| C  | 0.881961000  | -0.757007000 | 1.475236000  |
| C  | 0.983600000  | -1.695564000 | 0.399906000  |
| H  | 1.010987000  | 1.308886000  | 2.004861000  |
| H  | 0.578842000  | -1.111365000 | 2.451764000  |
| O  | 1.594232000  | 2.198415000  | -0.367324000 |
| O  | -0.799805000 | -0.471547000 | -0.690765000 |
| Cl | -2.256353000 | 0.009549000  | -0.325515000 |
| O  | -2.322026000 | 0.621272000  | 1.100885000  |
| H  | 0.730247000  | -2.732278000 | 0.589596000  |
| H  | 1.704370000  | -2.136002000 | -1.587488000 |
| Br | 2.272355000  | 0.509780000  | -2.826099000 |

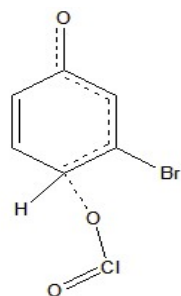

|    |              |              |              |
|----|--------------|--------------|--------------|
| C  | 1.524321000  | -1.358079000 | -0.842321000 |
| C  | 1.697313000  | -0.052936000 | -1.156383000 |
| C  | 1.453394000  | 0.992804000  | -0.134431000 |
| C  | 1.055478000  | 0.548573000  | 1.216753000  |
| C  | 0.846336000  | -0.762832000 | 1.463447000  |
| C  | 0.961654000  | -1.707597000 | 0.409146000  |
| H  | 0.947957000  | 1.311527000  | 1.977068000  |
| H  | 0.523101000  | -1.110234000 | 2.435766000  |
| O  | 1.607825000  | 2.171682000  | -0.403029000 |
| O  | -0.818326000 | -0.452473000 | -0.749305000 |
| Cl | -2.219125000 | 0.063891000  | -0.266027000 |
| O  | -2.162380000 | 0.561983000  | 1.198188000  |
| H  | 2.038409000  | 0.280846000  | -2.128412000 |
| Br | 1.839384000  | -2.721958000 | -2.112710000 |
| H  | 0.711164000  | -2.744025000 | 0.602734000  |

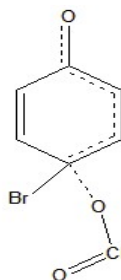

|    |              |              |              |
|----|--------------|--------------|--------------|
| C  | 1.538463000  | -1.370310000 | -0.846662000 |
| C  | 1.730434000  | -0.065745000 | -1.141042000 |
| C  | 1.471868000  | 0.991732000  | -0.138336000 |
| C  | 1.051968000  | 0.554285000  | 1.209867000  |
| C  | 0.828182000  | -0.747932000 | 1.471056000  |
| C  | 0.962007000  | -1.697159000 | 0.410957000  |
| H  | 0.937571000  | 1.319344000  | 1.967413000  |
| H  | 0.496603000  | -1.084267000 | 2.444165000  |
| O  | 1.637566000  | 2.169953000  | -0.403044000 |
| O  | -0.824187000 | -0.416355000 | -0.756705000 |
| Cl | -2.251787000 | 0.019965000  | -0.255141000 |
| O  | -2.214992000 | 0.502040000  | 1.223133000  |
| H  | 2.104613000  | 0.252732000  | -2.106585000 |
| H  | 1.723232000  | -2.150968000 | -1.572257000 |
| Br | 0.543343000  | -3.467447000 | 0.764790000  |

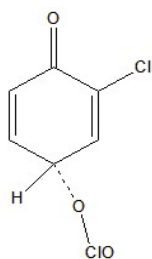

|    |              |              |              |
|----|--------------|--------------|--------------|
| C  | -0.231568000 | -0.174222000 | 0.364691000  |
| C  | 1.055813000  | 0.112851000  | 0.193926000  |
| C  | 1.541319000  | 1.509769000  | -0.006099000 |
| C  | 0.496715000  | 2.551147000  | -0.061100000 |
| C  | -0.794212000 | 2.273418000  | 0.105107000  |
| C  | -1.276085000 | 0.897701000  | 0.427831000  |
| H  | 0.843918000  | 3.560194000  | -0.249176000 |
| H  | -1.552781000 | 3.045854000  | 0.053065000  |
| O  | 2.718329000  | 1.774718000  | -0.133658000 |
| O  | -2.345969000 | 0.632416000  | -0.510416000 |
| Cl | -3.515575000 | -0.480745000 | 0.065711000  |
| O  | -3.064710000 | -1.933376000 | -0.158394000 |
| H  | -0.568507000 | -1.195942000 | 0.498652000  |
| H  | -1.698087000 | 0.913814000  | 1.441859000  |
| Cl | 2.265583000  | -1.132820000 | 0.174961000  |

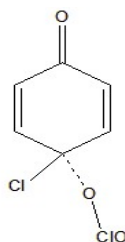

|    |              |              |              |
|----|--------------|--------------|--------------|
| C  | -0.318029000 | -0.133238000 | 0.579102000  |
| C  | 0.953224000  | 0.071832000  | 0.248232000  |
| C  | 1.452166000  | 1.409068000  | -0.138582000 |
| C  | 0.471669000  | 2.516251000  | -0.147385000 |
| C  | -0.802290000 | 2.324060000  | 0.181108000  |
| C  | -1.323043000 | 0.980472000  | 0.594780000  |
| H  | 0.838288000  | 3.494266000  | -0.435564000 |
| H  | -1.531845000 | 3.125038000  | 0.168699000  |
| O  | 2.617338000  | 1.590262000  | -0.440270000 |
| O  | -2.415604000 | 0.769927000  | -0.276185000 |
| Cl | -3.289937000 | -0.728672000 | -0.077052000 |
| O  | -2.637689000 | -1.855886000 | -0.880511000 |
| H  | 1.673997000  | -0.737007000 | 0.249478000  |
| Cl | -1.932564000 | 1.132173000  | 2.314593000  |
| H  | -0.673749000 | -1.115759000 | 0.868215000  |

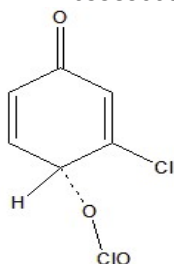

|    |              |              |              |
|----|--------------|--------------|--------------|
| C  | 0.058250000  | -0.300482000 | 0.329674000  |
| C  | 1.295504000  | 0.181772000  | 0.241993000  |
| C  | 1.537769000  | 1.629164000  | 0.063041000  |
| C  | 0.355227000  | 2.509894000  | -0.015138000 |
| C  | -0.877728000 | 2.020952000  | 0.081510000  |
| C  | -1.168060000 | 0.567171000  | 0.298213000  |
| H  | 0.541550000  | 3.566124000  | -0.168156000 |
| H  | -1.745651000 | 2.668194000  | 0.013130000  |
| O  | 2.671769000  | 2.066891000  | -0.018875000 |
| O  | -1.996055000 | 0.069974000  | -0.774001000 |
| Cl | -3.679472000 | 0.149045000  | -0.431737000 |
| O  | -4.068720000 | -0.925151000 | 0.592235000  |
| H  | -1.694302000 | 0.432390000  | 1.252223000  |
| Cl | -0.238334000 | -1.992271000 | 0.557685000  |
| H  | 2.165610000  | -0.459774000 | 0.305101000  |

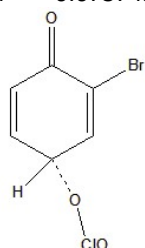

|    |              |              |              |
|----|--------------|--------------|--------------|
| C  | -0.227466000 | -0.172075000 | 0.359710000  |
| C  | 1.060910000  | 0.114819000  | 0.192378000  |
| C  | 1.543461000  | 1.513002000  | -0.005102000 |
| C  | 0.496322000  | 2.552840000  | -0.063169000 |
| C  | -0.794651000 | 2.274824000  | 0.100872000  |
| C  | -1.274441000 | 0.898978000  | 0.423870000  |
| H  | 0.843187000  | 3.562011000  | -0.251474000 |
| H  | -1.553643000 | 3.046750000  | 0.047291000  |
| O  | 2.719172000  | 1.785861000  | -0.128911000 |
| O  | -2.344293000 | 0.630906000  | -0.513057000 |
| Cl | -3.513840000 | -0.481116000 | 0.065968000  |
| O  | -3.062254000 | -1.934037000 | -0.154217000 |
| H  | -1.694503000 | 0.913137000  | 1.438835000  |
| H  | -0.569722000 | -1.192440000 | 0.490799000  |
| Br | 2.374086000  | -1.245332000 | 0.173626000  |

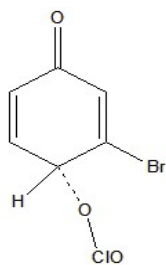

|    |              |              |              |
|----|--------------|--------------|--------------|
| C  | 0.06894000   | -0.31045800  | 0.336677000  |
| C  | 1.301337000  | 0.184542000  | 0.247754000  |
| C  | 1.532795000  | 1.634120000  | 0.057606000  |
| C  | 0.344187000  | 2.504575000  | -0.026483000 |
| C  | -0.884157000 | 2.004681000  | 0.072815000  |
| C  | -1.163030000 | 0.549595000  | 0.299492000  |
| H  | 0.521126000  | 3.561456000  | -0.185944000 |
| H  | -1.757461000 | 2.644580000  | 0.001079000  |
| O  | 2.663959000  | 2.077965000  | -0.028382000 |
| O  | -1.988223000 | 0.038470000  | -0.769186000 |
| Cl | -3.672338000 | 0.176823000  | -0.455272000 |
| O  | -4.104622000 | -0.844915000 | 0.605190000  |
| H  | 2.181079000  | -0.443317000 | 0.315222000  |
| Br | -0.228731000 | -2.155480000 | 0.602716000  |
| H  | -1.690818000 | 0.420041000  | 1.253259000  |

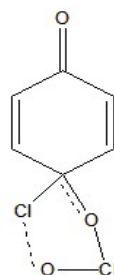

|    |              |              |              |
|----|--------------|--------------|--------------|
| C  | -0.419291000 | -0.838393000 | -0.696623000 |
| C  | -1.694201000 | -0.902967000 | -1.081647000 |
| C  | -2.784413000 | -0.329204000 | -0.257218000 |
| C  | -2.403942000 | 0.332339000  | 1.013682000  |
| C  | -1.132534000 | 0.392137000  | 1.411877000  |
| C  | -0.079876000 | -0.251138000 | 0.608462000  |
| H  | 0.377404000  | -1.258282000 | -1.296643000 |
| H  | -1.982009000 | -1.373411000 | -2.013896000 |
| H  | -3.203673000 | 0.776253000  | 1.594133000  |
| H  | -0.818891000 | 0.861041000  | 2.334854000  |
| O  | -3.943354000 | -0.388858000 | -0.615068000 |
| O  | 0.971512000  | -0.542547000 | 1.243937000  |
| Cl | 2.681148000  | -0.927287000 | 0.138207000  |
| O  | 2.848330000  | 0.205561000  | -0.845200000 |
| Cl | 0.692055000  | 1.978311000  | -0.493339000 |

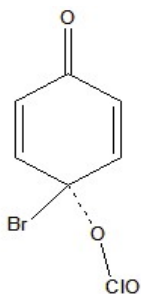

|    |              |              |              |
|----|--------------|--------------|--------------|
| C  | -0.323942000 | -0.138012000 | 0.551352000  |
| C  | 0.956664000  | 0.076139000  | 0.260154000  |
| C  | 1.462121000  | 1.419511000  | -0.092736000 |
| C  | 0.472942000  | 2.516400000  | -0.142934000 |
| C  | -0.809763000 | 2.315320000  | 0.148445000  |
| C  | -1.325885000 | 0.974382000  | 0.565105000  |
| H  | 0.838349000  | 3.495390000  | -0.429267000 |
| H  | -1.545034000 | 3.109761000  | 0.102417000  |
| O  | 2.638800000  | 1.611854000  | -0.340878000 |
| O  | -2.437678000 | 0.763075000  | -0.275702000 |
| Cl | -3.306536000 | -0.737928000 | -0.066651000 |
| O  | -2.660728000 | -1.863388000 | -0.877144000 |
| H  | 1.678886000  | -0.731366000 | 0.269207000  |
| H  | -0.683482000 | -1.127592000 | 0.809743000  |
| Br | -1.937277000 | 1.161867000  | 2.462948000  |

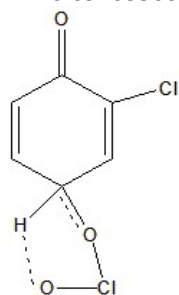

|    |              |              |              |
|----|--------------|--------------|--------------|
| C  | 0.414382000  | -1.193610000 | -0.141121000 |
| C  | 1.721826000  | -1.381836000 | 0.031910000  |
| C  | 2.668681000  | -0.254694000 | 0.262455000  |
| C  | 2.082632000  | 1.096546000  | 0.219829000  |
| C  | 0.777060000  | 1.305166000  | 0.049037000  |
| C  | -0.187858000 | 0.171410000  | -0.055879000 |
| H  | -0.265943000 | -2.016986000 | -0.324271000 |
| H  | 2.782060000  | 1.917895000  | 0.323183000  |
| H  | 0.354861000  | 2.302789000  | 0.005234000  |
| H  | -0.721508000 | 0.171941000  | 0.982071000  |
| O  | 3.855741000  | -0.435173000 | 0.456118000  |
| O  | -1.163942000 | 0.379198000  | -0.975223000 |
| Cl | -2.853268000 | 0.489677000  | 0.033652000  |
| O  | -2.299698000 | 0.322720000  | 1.470153000  |
| Cl | 2.416527000  | -2.976142000 | -0.029265000 |

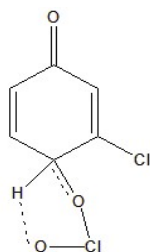

|    |              |              |              |
|----|--------------|--------------|--------------|
| C  | 0.420762000  | -1.189787000 | -0.126060000 |
| C  | 1.727877000  | -1.392819000 | 0.035860000  |
| C  | 2.655480000  | -0.263460000 | 0.244234000  |
| C  | 2.087211000  | 1.096712000  | 0.214414000  |
| C  | 0.780185000  | 1.302699000  | 0.061514000  |
| C  | -0.203052000 | 0.178730000  | -0.050674000 |
| H  | 2.785589000  | 1.920085000  | 0.307987000  |
| H  | 0.352921000  | 2.298436000  | 0.024590000  |
| H  | -0.747641000 | 0.177781000  | 0.982625000  |
| O  | 3.848121000  | -0.458141000 | 0.421045000  |
| O  | -1.158086000 | 0.406337000  | -0.976512000 |
| Cl | -2.868441000 | 0.509414000  | 0.020075000  |
| O  | -2.319765000 | 0.308999000  | 1.453996000  |
| Cl | -0.678702000 | -2.503215000 | -0.379928000 |
| H  | 2.159222000  | -2.386063000 | 0.012363000  |

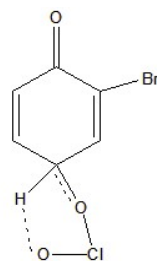

|    |              |              |              |
|----|--------------|--------------|--------------|
| C  | 0.418277000  | -1.192840000 | -0.142414000 |
| C  | 1.725891000  | -1.381688000 | 0.032407000  |
| C  | 2.669869000  | -0.252634000 | 0.265832000  |
| C  | 2.081855000  | 1.098569000  | 0.218952000  |
| C  | 0.776539000  | 1.306782000  | 0.047151000  |
| C  | -0.186655000 | 0.171937000  | -0.056008000 |
| H  | 2.781134000  | 1.920266000  | 0.321011000  |
| H  | 0.354096000  | 2.304218000  | 0.001290000  |
| H  | -0.718609000 | 0.168782000  | 0.982545000  |
| O  | 3.857050000  | -0.425945000 | 0.465589000  |
| O  | -1.164512000 | 0.376148000  | -0.974275000 |
| Cl | -2.851453000 | 0.491559000  | 0.036860000  |
| O  | -2.296861000 | 0.322174000  | 1.472624000  |
| Br | 2.477522000  | -3.118548000 | -0.038688000 |
| H  | -0.265929000 | -2.012452000 | -0.328305000 |

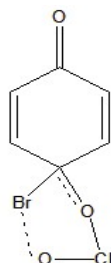

|    |              |              |              |
|----|--------------|--------------|--------------|
| C  | -0.427331000 | -0.819830000 | -0.726824000 |
| C  | -1.708805000 | -0.907444000 | -1.085947000 |
| C  | -2.791455000 | -0.348560000 | -0.245240000 |
| C  | -2.396964000 | 0.327956000  | 1.010064000  |
| C  | -1.118771000 | 0.422188000  | 1.381250000  |
| C  | -0.062621000 | -0.205478000 | 0.563323000  |
| H  | 0.364793000  | -1.236218000 | -1.336553000 |
| H  | -2.005773000 | -1.391280000 | -2.008538000 |
| H  | -3.192197000 | 0.756211000  | 1.608255000  |
| H  | -0.799908000 | 0.899946000  | 2.298024000  |
| O  | -3.958538000 | -0.434224000 | -0.578669000 |
| O  | 0.949660000  | -0.593894000 | 1.234724000  |
| Cl | 2.677273000  | -0.965493000 | 0.170958000  |
| O  | 2.877989000  | 0.200106000  | -0.775783000 |
| Br | 0.700914000  | 2.029568000  | -0.463524000 |

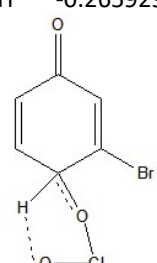

|    |              |              |              |
|----|--------------|--------------|--------------|
| C  | 0.420001000  | -1.196102000 | -0.128807000 |
| C  | 1.727935000  | -1.393639000 | 0.035481000  |
| C  | 2.654863000  | -0.261723000 | 0.245323000  |
| C  | 2.084770000  | 1.096663000  | 0.214813000  |
| C  | 0.777273000  | 1.298284000  | 0.060328000  |
| C  | -0.204852000 | 0.172402000  | -0.051430000 |
| H  | 2.780667000  | 1.922098000  | 0.308771000  |
| H  | 0.347358000  | 2.292980000  | 0.023121000  |
| H  | -0.747138000 | 0.173841000  | 0.982544000  |
| O  | 3.847218000  | -0.456490000 | 0.422905000  |
| O  | -1.161081000 | 0.405392000  | -0.975516000 |
| Cl | -2.866142000 | 0.532039000  | 0.024564000  |
| O  | -2.318161000 | 0.327514000  | 1.458036000  |
| H  | 2.167795000  | -2.383224000 | 0.012201000  |
| Br | -0.764985000 | -2.637821000 | -0.406074000 |

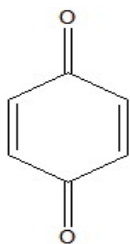

|   |              |              |              |
|---|--------------|--------------|--------------|
| C | 0.727357000  | -1.070821000 | 0.090875000  |
| C | -0.158623000 | -0.073971000 | 0.106570000  |
| C | 0.279152000  | 1.343381000  | 0.051597000  |
| C | 1.737053000  | 1.612334000  | -0.021689000 |
| C | 2.623033000  | 0.615515000  | -0.037386000 |
| C | 2.185268000  | -0.801873000 | 0.017302000  |
| H | 2.034560000  | 2.654012000  | -0.062323000 |
| H | 3.691723000  | 0.788923000  | -0.092140000 |
| O | -0.528486000 | 2.252330000  | 0.065580000  |
| O | 2.992923000  | -1.710789000 | 0.003661000  |
| H | 0.429853000  | -2.112456000 | 0.131673000  |
| H | -1.227280000 | -0.247339000 | 0.161478000  |

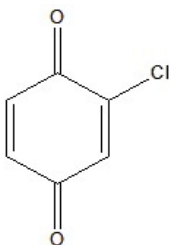

|    |              |              |              |
|----|--------------|--------------|--------------|
| C  | 0.720710000  | -1.073629000 | 0.091756000  |
| C  | -0.160275000 | -0.072552000 | 0.106951000  |
| C  | 0.274968000  | 1.364235000  | 0.051778000  |
| C  | 1.735087000  | 1.609673000  | -0.021597000 |
| C  | 2.618002000  | 0.612237000  | -0.037276000 |
| C  | 2.176138000  | -0.802578000 | 0.018817000  |
| H  | 0.418856000  | -2.112995000 | 0.132096000  |
| H  | 2.033007000  | 2.650742000  | -0.062685000 |
| H  | 3.686531000  | 0.783829000  | -0.092707000 |
| O  | -0.521276000 | 2.273695000  | 0.065815000  |
| O  | 2.976589000  | -1.715912000 | 0.004579000  |
| Cl | -1.861197000 | -0.354043000 | 0.191430000  |

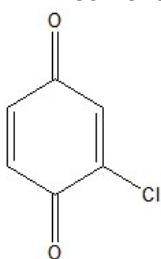

|   |              |              |              |
|---|--------------|--------------|--------------|
| C | 0.723161000  | -1.070303000 | 0.091415000  |
| C | -0.165324000 | -0.075797000 | 0.107548000  |
| C | 0.278179000  | 1.337817000  | 0.051963000  |
| C | 1.734734000  | 1.607518000  | -0.021911000 |
| C | 2.619101000  | 0.611367000  | -0.037014000 |
| C | 2.200577000  | -0.809779000 | 0.018268000  |

|    |              |              |              |
|----|--------------|--------------|--------------|
| H  | 2.033271000  | 2.648402000  | -0.063626000 |
| H  | 3.687761000  | 0.782074000  | -0.092335000 |
| O  | -0.532285000 | 2.242331000  | 0.066777000  |
| O  | 3.007886000  | -1.709457000 | 0.004104000  |
| Cl | 0.241775000  | -2.727003000 | 0.153582000  |
| H  | -1.232832000 | -0.250597000 | 0.162095000  |

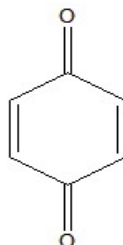

|   |              |              |              |
|---|--------------|--------------|--------------|
| C | 0.727357000  | -1.070821000 | 0.090875000  |
| C | -0.158623000 | -0.073971000 | 0.106570000  |
| C | 0.279152000  | 1.343381000  | 0.051597000  |
| C | 1.737053000  | 1.612334000  | -0.021689000 |
| C | 2.623033000  | 0.615515000  | -0.037386000 |
| C | 2.185268000  | -0.801873000 | 0.017302000  |
| H | 2.034560000  | 2.654012000  | -0.062323000 |
| H | 3.691723000  | 0.788923000  | -0.092140000 |
| O | -0.528486000 | 2.252330000  | 0.065580000  |
| O | 2.992923000  | -1.710789000 | 0.003661000  |
| H | 0.429853000  | -2.112456000 | 0.131673000  |
| H | -1.227280000 | -0.247339000 | 0.161478000  |

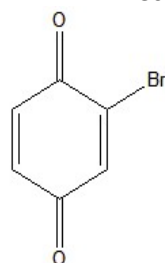

|    |              |              |              |
|----|--------------|--------------|--------------|
| C  | 0.718570000  | -1.068951000 | 0.091751000  |
| C  | -0.163436000 | -0.068429000 | 0.106784000  |
| C  | 0.275142000  | 1.366644000  | 0.051894000  |
| C  | 1.736793000  | 1.609657000  | -0.021878000 |
| C  | 2.620157000  | 0.612752000  | -0.037678000 |
| C  | 2.176357000  | -0.800411000 | 0.017941000  |
| H  | 2.034805000  | 2.650775000  | -0.062915000 |
| H  | 3.688641000  | 0.784538000  | -0.093085000 |
| O  | -0.514338000 | 2.282285000  | 0.066331000  |
| O  | 2.973491000  | -1.716522000 | 0.005711000  |
| Br | -2.016454000 | -0.381386000 | 0.198539000  |
| H  | 0.422441000  | -2.110032000 | 0.132241000  |

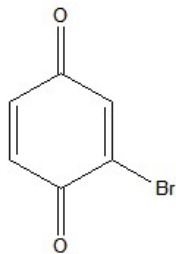

|    |              |              |              |
|----|--------------|--------------|--------------|
| C  | 0.724242000  | -1.073601000 | 0.091178000  |
| C  | -0.162869000 | -0.077504000 | 0.107893000  |
| C  | 0.279205000  | 1.338427000  | 0.052793000  |
| C  | 1.734510000  | 1.609140000  | -0.022770000 |
| C  | 2.617762000  | 0.612131000  | -0.037643000 |
| C  | 2.200701000  | -0.810518000 | 0.019504000  |
| H  | 2.033604000  | 2.649804000  | -0.065708000 |
| H  | 3.686520000  | 0.782384000  | -0.093883000 |
| O  | -0.533729000 | 2.240553000  | 0.068920000  |
| O  | 3.014112000  | -1.704957000 | 0.007832000  |
| H  | -1.231397000 | -0.246309000 | 0.162126000  |
| Br | 0.191925000  | -2.877041000 | 0.156205000  |

#### HOCl

|    |              |              |             |
|----|--------------|--------------|-------------|
| O  | 0.033363000  | 1.111412000  | 0.000000000 |
| H  | -0.902325000 | 1.348070000  | 0.000000000 |
| Cl | 0.034762000  | -0.592693000 | 0.000000000 |

#### Cl<sub>2</sub>O

|    |             |              |              |
|----|-------------|--------------|--------------|
| O  | 0.000000000 | 0.000000000  | 0.769009000  |
| Cl | 0.000000000 | 1.454880000  | -0.180836000 |
| Cl | 0.000000000 | -1.454880000 | -0.180836000 |

#### BrOCl

|    |              |              |             |
|----|--------------|--------------|-------------|
| O  | 0.002662000  | 0.996516000  | 0.000000000 |
| Cl | 1.708495000  | 0.930470000  | 0.000000000 |
| Br | -0.820082000 | -0.669932000 | 0.000000000 |

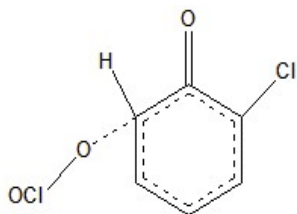

|    |              |              |              |
|----|--------------|--------------|--------------|
| C  | 1.493945000  | -1.209447000 | -0.839547000 |
| C  | 1.853939000  | 0.131439000  | -0.961682000 |
| C  | 1.581898000  | 1.100769000  | 0.019896000  |
| C  | 0.898786000  | 0.740222000  | 1.145004000  |
| C  | 0.501440000  | -0.681181000 | 1.368769000  |
| C  | 0.803872000  | -1.630859000 | 0.271815000  |
| H  | 1.766237000  | -1.914131000 | -1.613887000 |
| H  | 2.403099000  | 0.445704000  | -1.842348000 |
| H  | 0.632011000  | -2.675334000 | 0.489940000  |
| O  | -1.415897000 | -1.701455000 | -0.383122000 |
| Cl | -2.170486000 | -0.610810000 | 0.426628000  |

|    |              |              |              |
|----|--------------|--------------|--------------|
| O  | -1.384336000 | 0.714436000  | 0.236096000  |
| O  | -0.082299000 | -1.046199000 | 2.371881000  |
| H  | 1.904596000  | 2.123184000  | -0.124115000 |
| Cl | 0.647844000  | 1.843912000  | 2.432164000  |

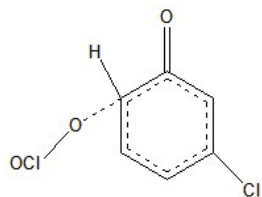

|    |              |              |              |
|----|--------------|--------------|--------------|
| C  | 1.588172000  | -1.261147000 | -0.820625000 |
| C  | 1.892876000  | 0.098433000  | -0.973046000 |
| C  | 1.516570000  | 1.053229000  | -0.025343000 |
| C  | 0.809903000  | 0.696402000  | 1.093210000  |
| C  | 0.527776000  | -0.733822000 | 1.333049000  |
| C  | 0.886379000  | -1.692053000 | 0.272511000  |
| H  | 1.904312000  | -1.959802000 | -1.583712000 |
| H  | 2.453893000  | 0.419006000  | -1.843364000 |
| H  | 0.688183000  | -2.737189000 | 0.465771000  |
| O  | -1.412143000 | -1.482202000 | -0.397851000 |
| Cl | -2.141965000 | -0.468604000 | 0.514175000  |
| O  | -1.399129000 | 0.887284000  | 0.397554000  |
| O  | -0.070640000 | -1.085863000 | 2.340417000  |
| Cl | 1.926802000  | 2.727784000  | -0.294979000 |
| H  | 0.581847000  | 1.390317000  | 1.889884000  |

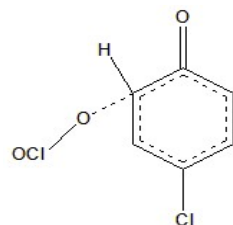

|    |              |              |              |
|----|--------------|--------------|--------------|
| C  | 1.585838000  | -1.268514000 | -0.827887000 |
| C  | 1.886168000  | 0.096528000  | -0.964164000 |
| C  | 1.526164000  | 1.076680000  | -0.026205000 |
| C  | 0.819596000  | 0.702345000  | 1.082105000  |
| C  | 0.527337000  | -0.724053000 | 1.331920000  |
| C  | 0.880491000  | -1.683524000 | 0.265861000  |
| H  | 1.900182000  | -1.967792000 | -1.590611000 |
| H  | 0.683986000  | -2.729053000 | 0.458785000  |
| O  | -1.394173000 | -1.498538000 | -0.403871000 |
| Cl | -2.168156000 | -0.504133000 | 0.507081000  |
| O  | -1.450061000 | 0.872086000  | 0.411916000  |
| O  | -0.045041000 | -1.086256000 | 2.348686000  |
| H  | 0.580223000  | 1.400165000  | 1.872452000  |
| H  | 1.794488000  | 2.110392000  | -0.196765000 |
| Cl | 2.775895000  | 0.591941000  | -2.351084000 |

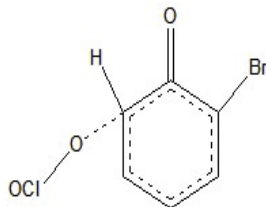

|    |              |              |              |
|----|--------------|--------------|--------------|
| C  | 1.492868000  | -1.207708000 | -0.839227000 |
| C  | 1.854408000  | 0.132729000  | -0.960012000 |
| C  | 1.585020000  | 1.099882000  | 0.025157000  |
| C  | 0.901368000  | 0.740572000  | 1.151210000  |
| C  | 0.498715000  | -0.679188000 | 1.369335000  |
| C  | 0.804930000  | -1.628626000 | 0.273117000  |
| H  | 1.763496000  | -1.912242000 | -1.614372000 |
| H  | 0.629210000  | -2.672885000 | 0.489130000  |
| O  | -1.431607000 | -1.715445000 | -0.382974000 |
| Cl | -2.174689000 | -0.620379000 | 0.427948000  |
| O  | -1.388120000 | 0.701971000  | 0.229157000  |
| O  | -0.094397000 | -1.050209000 | 2.365782000  |
| H  | 2.403633000  | 0.448226000  | -1.840243000 |
| H  | 1.913017000  | 2.120219000  | -0.121216000 |
| Br | 0.638223000  | 1.947305000  | 2.554171000  |

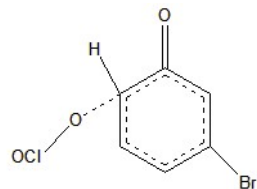

|    |              |              |              |
|----|--------------|--------------|--------------|
| C  | 1.587243000  | -1.262719000 | -0.819389000 |
| C  | 1.893930000  | 0.096270000  | -0.971239000 |
| C  | 1.519584000  | 1.053796000  | -0.023324000 |
| C  | 0.811557000  | 0.695983000  | 1.094203000  |
| C  | 0.527037000  | -0.734886000 | 1.334283000  |
| C  | 0.883081000  | -1.693070000 | 0.272891000  |
| H  | 1.902668000  | -1.961678000 | -1.582602000 |
| H  | 0.683779000  | -2.738123000 | 0.465752000  |
| O  | -1.404650000 | -1.475914000 | -0.400677000 |
| Cl | -2.141529000 | -0.466741000 | 0.511972000  |
| O  | -1.401462000 | 0.891334000  | 0.401840000  |
| O  | -0.070354000 | -1.086309000 | 2.342153000  |
| H  | 0.580855000  | 1.385710000  | 1.893796000  |
| Br | 1.960680000  | 2.875280000  | -0.318820000 |
| H  | 2.455834000  | 0.411011000  | -1.843052000 |

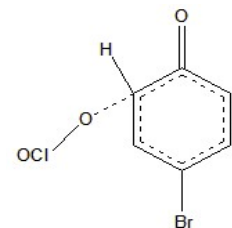

|   |             |              |              |
|---|-------------|--------------|--------------|
| C | 1.587077000 | -1.268055000 | -0.827646000 |
| C | 1.887689000 | 0.097239000  | -0.966456000 |
| C | 1.527858000 | 1.076163000  | -0.026401000 |

|    |              |              |              |
|----|--------------|--------------|--------------|
| C  | 0.821604000  | 0.701388000  | 1.082772000  |
| C  | 0.527458000  | -0.723877000 | 1.331767000  |
| C  | 0.881921000  | -1.682997000 | 0.267033000  |
| H  | 1.898416000  | -1.972161000 | -1.587096000 |
| H  | 0.685146000  | -2.728654000 | 0.459516000  |
| O  | -1.396998000 | -1.498536000 | -0.404554000 |
| Cl | -2.167294000 | -0.504667000 | 0.508428000  |
| O  | -1.452108000 | 0.871788000  | 0.410370000  |
| O  | -0.050056000 | -1.085353000 | 2.346552000  |
| H  | 0.582056000  | 1.399638000  | 1.872834000  |
| H  | 1.793002000  | 2.111521000  | -0.191824000 |
| Br | 2.854106000  | 0.637135000  | -2.478697000 |

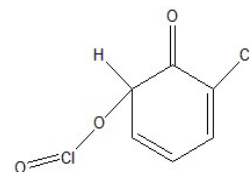

|    |              |              |              |
|----|--------------|--------------|--------------|
| C  | 0.057977000  | -0.300550000 | -0.117184000 |
| C  | 1.273345000  | 0.246730000  | -0.048587000 |
| C  | 1.450568000  | 1.669910000  | 0.202230000  |
| C  | 0.410183000  | 2.517151000  | 0.292145000  |
| C  | -0.967328000 | 2.042849000  | 0.085893000  |
| C  | -1.149066000 | 0.524583000  | 0.181419000  |
| O  | -2.220000000 | 0.091053000  | -0.647753000 |
| Cl | -3.777651000 | 0.345979000  | 0.045969000  |
| O  | -4.228747000 | -0.918443000 | 0.789381000  |
| H  | -0.099405000 | -1.356720000 | -0.297065000 |
| H  | -1.390162000 | 0.341825000  | 1.242955000  |
| O  | -1.917857000 | 2.762388000  | -0.116824000 |
| H  | 2.162162000  | -0.356610000 | -0.181185000 |
| H  | 2.460336000  | 2.055637000  | 0.281023000  |
| Cl | 0.636743000  | 4.228559000  | 0.476845000  |

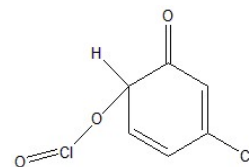

|    |              |              |              |
|----|--------------|--------------|--------------|
| C  | 0.062168000  | -0.298671000 | -0.119602000 |
| C  | 1.280909000  | 0.239403000  | -0.065681000 |
| C  | 1.436543000  | 1.667466000  | 0.195415000  |
| C  | 0.408922000  | 2.530444000  | 0.287601000  |
| C  | -0.950078000 | 2.037193000  | 0.085446000  |
| C  | -1.145281000 | 0.522143000  | 0.191183000  |
| O  | -2.217756000 | 0.082037000  | -0.635028000 |
| Cl | -3.771054000 | 0.354230000  | 0.056226000  |
| O  | -4.233855000 | -0.903927000 | 0.804976000  |
| H  | -0.091696000 | -1.353595000 | -0.309920000 |
| H  | -1.381201000 | 0.335389000  | 1.252412000  |
| O  | -1.901466000 | 2.760968000  | -0.126213000 |
| H  | 2.170161000  | -0.357576000 | -0.219078000 |
| Cl | 3.067039000  | 2.244166000  | 0.332569000  |
| H  | 0.555349000  | 3.596927000  | 0.397587000  |

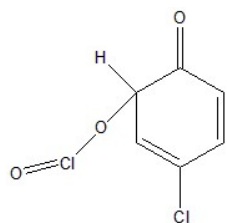

|    |              |              |              |
|----|--------------|--------------|--------------|
| C  | 0.052027000  | -0.313034000 | -0.111463000 |
| C  | 1.260320000  | 0.244988000  | -0.056304000 |
| C  | 1.455983000  | 1.670307000  | 0.199260000  |
| C  | 0.419991000  | 2.518057000  | 0.297080000  |
| C  | -0.948339000 | 2.034687000  | 0.098961000  |
| C  | -1.149550000 | 0.519340000  | 0.198684000  |
| O  | -2.214198000 | 0.088157000  | -0.644539000 |
| Cl | -3.774593000 | 0.349208000  | 0.035329000  |
| O  | -4.237578000 | -0.913801000 | 0.775511000  |
| H  | -0.102435000 | -1.369082000 | -0.290867000 |
| H  | -1.402243000 | 0.328460000  | 1.255088000  |
| O  | -1.894953000 | 2.761269000  | -0.116021000 |
| H  | 0.567336000  | 3.584319000  | 0.414751000  |
| H  | 2.473112000  | 2.036724000  | 0.274962000  |
| Cl | 2.700503000  | -0.708274000 | -0.294471000 |

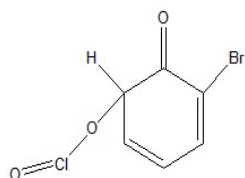

|    |              |              |              |
|----|--------------|--------------|--------------|
| C  | 0.057369000  | -0.300617000 | -0.121140000 |
| C  | 1.271660000  | 0.248552000  | -0.050758000 |
| C  | 1.445200000  | 1.671755000  | 0.206089000  |
| C  | 0.403735000  | 2.519146000  | 0.296415000  |
| C  | -0.971019000 | 2.041648000  | 0.078478000  |
| C  | -1.149910000 | 0.522718000  | 0.179887000  |
| O  | -2.222515000 | 0.083516000  | -0.644116000 |
| Cl | -3.778228000 | 0.347594000  | 0.049774000  |
| O  | -4.231745000 | -0.911746000 | 0.801384000  |
| H  | -0.098610000 | -1.356463000 | -0.304229000 |
| H  | -1.387269000 | 0.343462000  | 1.242896000  |
| O  | -1.923804000 | 2.754209000  | -0.136794000 |
| H  | 2.161938000  | -0.352384000 | -0.185005000 |
| H  | 2.456179000  | 2.052911000  | 0.290712000  |
| Br | 0.651328000  | 4.380888000  | 0.501195000  |

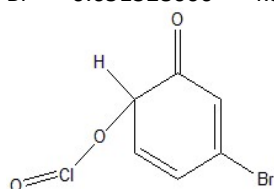

|   |              |              |              |
|---|--------------|--------------|--------------|
| C | 0.061644000  | -0.297270000 | -0.124099000 |
| C | 1.280756000  | 0.240941000  | -0.070295000 |
| C | 1.437671000  | 1.669181000  | 0.194654000  |
| C | 0.408175000  | 2.529880000  | 0.286428000  |
| C | -0.951864000 | 2.035654000  | 0.079865000  |

|    |              |              |              |
|----|--------------|--------------|--------------|
| C  | -1.146327000 | 0.521647000  | 0.189336000  |
| O  | -2.220885000 | 0.078335000  | -0.632633000 |
| Cl | -3.772444000 | 0.354377000  | 0.060745000  |
| O  | -4.231643000 | -0.897610000 | 0.821978000  |
| H  | -0.091708000 | -1.352035000 | -0.316226000 |
| H  | -1.378802000 | 0.336868000  | 1.251753000  |
| O  | -1.901035000 | 2.760093000  | -0.137729000 |
| H  | 0.546712000  | 3.597023000  | 0.400108000  |
| Br | 3.210210000  | 2.302238000  | 0.353306000  |
| H  | 2.166615000  | -0.360148000 | -0.227053000 |

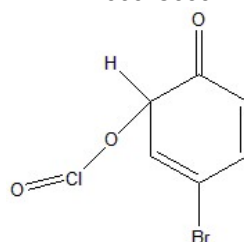

|    |              |              |              |
|----|--------------|--------------|--------------|
| C  | 0.053611000  | -0.311970000 | -0.115523000 |
| C  | 1.263173000  | 0.243922000  | -0.054955000 |
| C  | 1.455528000  | 1.669754000  | 0.205203000  |
| C  | 0.418024000  | 2.517064000  | 0.297998000  |
| C  | -0.949153000 | 2.034690000  | 0.092618000  |
| C  | -1.149311000 | 0.520112000  | 0.195013000  |
| O  | -2.215373000 | 0.084735000  | -0.643231000 |
| Cl | -3.774556000 | 0.348351000  | 0.039125000  |
| O  | -4.234869000 | -0.910949000 | 0.787081000  |
| H  | -0.107071000 | -1.366179000 | -0.300699000 |
| H  | -1.396724000 | 0.330676000  | 1.253094000  |
| O  | -1.894922000 | 2.760838000  | -0.128073000 |
| H  | 0.565068000  | 3.583272000  | 0.417362000  |
| H  | 2.470052000  | 2.041474000  | 0.288508000  |
| Br | 2.825686000  | -0.796816000 | -0.317477000 |

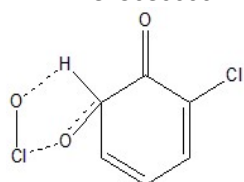

|    |              |              |              |
|----|--------------|--------------|--------------|
| C  | -0.146115000 | 1.963492000  | -0.162140000 |
| C  | 1.121104000  | 2.244761000  | -0.478958000 |
| C  | 2.158193000  | 1.233219000  | -0.386857000 |
| C  | 1.917999000  | -0.014872000 | 0.057207000  |
| C  | 0.583029000  | -0.437902000 | 0.507787000  |
| C  | -0.535311000 | 0.575001000  | 0.219514000  |
| H  | -0.938578000 | 2.700904000  | -0.205156000 |
| H  | -0.937852000 | 0.124691000  | -0.774326000 |
| O  | -1.538887000 | 0.505752000  | 1.122125000  |
| Cl | -3.049889000 | -0.326906000 | 0.216957000  |
| O  | -2.431486000 | -0.556006000 | -1.183999000 |
| O  | 0.340089000  | -1.501876000 | 1.026463000  |
| H  | 3.168848000  | 1.509399000  | -0.665415000 |

|    |             |              |              |
|----|-------------|--------------|--------------|
| H  | 1.408265000 | 3.239598000  | -0.794985000 |
| Cl | 3.201602000 | -1.176231000 | 0.230265000  |

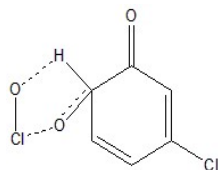

|    |              |              |              |
|----|--------------|--------------|--------------|
| C  | -0.144048000 | 1.953596000  | -0.158218000 |
| C  | 1.119759000  | 2.257589000  | -0.462459000 |
| C  | 2.148673000  | 1.232742000  | -0.367291000 |
| C  | 1.933316000  | -0.023193000 | 0.067280000  |
| C  | 0.600875000  | -0.435755000 | 0.497196000  |
| C  | -0.533315000 | 0.561218000  | 0.212419000  |
| H  | -0.936260000 | 2.691671000  | -0.197774000 |
| H  | -0.936414000 | 0.112492000  | -0.780699000 |
| O  | -1.534917000 | 0.491154000  | 1.116543000  |
| Cl | -3.065788000 | -0.296338000 | 0.195208000  |
| O  | -2.443301000 | -0.530679000 | -1.203592000 |
| O  | 0.368844000  | -1.508947000 | 1.012131000  |
| H  | 2.737458000  | -0.739890000 | 0.174499000  |
| H  | 1.406431000  | 3.257967000  | -0.759222000 |
| Cl | 3.754217000  | 1.719201000  | -0.821260000 |

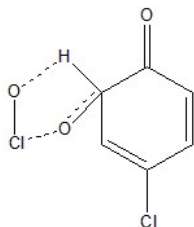

|    |              |              |              |
|----|--------------|--------------|--------------|
| C  | -0.160969000 | 1.954178000  | -0.157804000 |
| C  | 1.106913000  | 2.238183000  | -0.454677000 |
| C  | 2.165978000  | 1.242378000  | -0.366771000 |
| C  | 1.936026000  | -0.008388000 | 0.067179000  |
| C  | 0.604095000  | -0.437845000 | 0.497413000  |
| C  | -0.536035000 | 0.553840000  | 0.210416000  |
| H  | -0.955539000 | 2.688468000  | -0.200992000 |
| H  | -0.936250000 | 0.099005000  | -0.778594000 |
| O  | -1.534137000 | 0.477554000  | 1.118246000  |
| Cl | -3.080762000 | -0.267962000 | 0.191947000  |
| O  | -2.464832000 | -0.518152000 | -1.206342000 |
| O  | 0.377661000  | -1.510089000 | 1.012951000  |
| H  | 2.742374000  | -0.724041000 | 0.172729000  |
| Cl | 1.580021000  | 3.848684000  | -0.939736000 |
| H  | 3.169828000  | 1.544384000  | -0.642879000 |

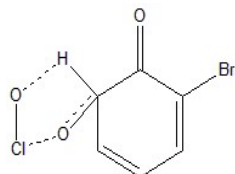

|   |              |             |              |
|---|--------------|-------------|--------------|
| C | -0.147277000 | 1.964513000 | -0.157994000 |
| C | 1.119856000  | 2.245490000 | -0.475046000 |
| C | 2.155520000  | 1.231569000 | -0.386825000 |

|    |              |              |              |
|----|--------------|--------------|--------------|
| C  | 1.916246000  | -0.018473000 | 0.055016000  |
| C  | 0.582250000  | -0.437872000 | 0.511576000  |
| C  | -0.536479000 | 0.575628000  | 0.220858000  |
| H  | -0.939354000 | 2.702557000  | -0.198167000 |
| H  | -0.934998000 | 0.125388000  | -0.774439000 |
| O  | -1.542887000 | 0.505903000  | 1.120058000  |
| Cl | -3.049257000 | -0.331077000 | 0.211250000  |
| O  | -2.427095000 | -0.558785000 | -1.188244000 |
| O  | 0.334191000  | -1.497968000 | 1.035685000  |
| H  | 1.408236000  | 3.240792000  | -0.788657000 |
| H  | 3.163925000  | 1.511917000  | -0.669333000 |
| Br | 3.315003000  | -1.280248000 | 0.237849000  |

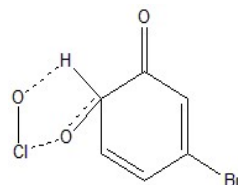

|    |              |              |              |
|----|--------------|--------------|--------------|
| C  | -0.144959000 | 1.953811000  | -0.154661000 |
| C  | 1.118785000  | 2.258137000  | -0.460503000 |
| C  | 2.148928000  | 1.232851000  | -0.369200000 |
| C  | 1.931861000  | -0.022399000 | 0.066332000  |
| C  | 0.598596000  | -0.433722000 | 0.501678000  |
| C  | -0.535267000 | 0.561498000  | 0.214506000  |
| H  | -0.936801000 | 2.692525000  | -0.192315000 |
| H  | -0.934440000 | 0.112733000  | -0.780215000 |
| O  | -1.540124000 | 0.490283000  | 1.115124000  |
| Cl | -3.066317000 | -0.299412000 | 0.188978000  |
| O  | -2.439586000 | -0.532870000 | -1.208031000 |
| O  | 0.369534000  | -1.505203000 | 1.020881000  |
| H  | 2.730552000  | -0.745268000 | 0.173233000  |
| Br | 3.896650000  | 1.755772000  | -0.870861000 |
| H  | 1.400048000  | 3.260575000  | -0.755182000 |

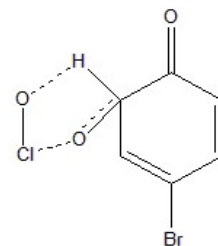

|    |              |              |              |
|----|--------------|--------------|--------------|
| C  | -0.159470000 | 1.955143000  | -0.155068000 |
| C  | 1.107766000  | 2.240081000  | -0.456305000 |
| C  | 2.165453000  | 1.241426000  | -0.369152000 |
| C  | 1.934406000  | -0.008960000 | 0.066792000  |
| C  | 0.603580000  | -0.437488000 | 0.500074000  |
| C  | -0.535505000 | 0.554117000  | 0.212373000  |
| H  | -0.957702000 | 2.685824000  | -0.193278000 |
| H  | -0.933219000 | 0.102588000  | -0.779102000 |
| O  | -1.536468000 | 0.478495000  | 1.117109000  |
| Cl | -3.078727000 | -0.270636000 | 0.188183000  |
| O  | -2.460799000 | -0.517269000 | -1.209786000 |
| O  | 0.377277000  | -1.508852000 | 1.017825000  |

|    |             |              |              |
|----|-------------|--------------|--------------|
| H  | 2.740673000 | -0.724926000 | 0.171903000  |
| H  | 3.170879000 | 1.537043000  | -0.646087000 |
| Br | 1.615218000 | 3.992574000  | -0.983247000 |

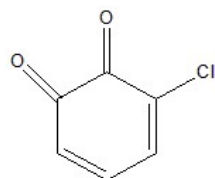

|    |              |              |              |
|----|--------------|--------------|--------------|
| C  | -1.706734000 | 0.152483000  | 0.000292000  |
| C  | -0.244237000 | 0.139001000  | 0.001310000  |
| C  | 0.474310000  | 1.269908000  | 0.001135000  |
| C  | -0.192348000 | 2.589538000  | 0.000302000  |
| C  | -1.757833000 | 2.579581000  | -0.003557000 |
| C  | -2.430491000 | 1.280583000  | -0.001875000 |
| H  | -2.202447000 | -0.810965000 | 0.001174000  |
| H  | 0.254306000  | -0.822608000 | 0.002318000  |
| H  | -3.513375000 | 1.274445000  | -0.003016000 |
| O  | 0.392163000  | 3.641161000  | 0.002346000  |
| O  | -2.333555000 | 3.641209000  | -0.008148000 |
| Cl | 2.206453000  | 1.262715000  | 0.002439000  |

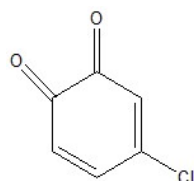

|    |              |              |              |
|----|--------------|--------------|--------------|
| C  | -1.714680000 | 0.141339000  | 0.000499000  |
| C  | -0.247140000 | 0.158208000  | 0.001100000  |
| C  | 0.485005000  | 1.281274000  | 0.001011000  |
| C  | -0.192747000 | 2.578143000  | 0.000561000  |
| C  | -1.751529000 | 2.579190000  | -0.004000000 |
| C  | -2.426336000 | 1.274130000  | -0.001698000 |
| H  | -2.204901000 | -0.824440000 | 0.001771000  |
| H  | -3.509365000 | 1.268221000  | -0.002522000 |
| O  | 0.398229000  | 3.633244000  | 0.003403000  |
| O  | -2.342306000 | 3.632443000  | -0.009414000 |
| Cl | 0.523626000  | -1.393237000 | 0.002243000  |
| H  | 1.567258000  | 1.272225000  | 0.001917000  |

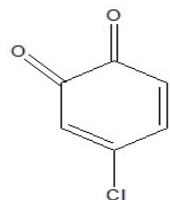

|   |              |             |              |
|---|--------------|-------------|--------------|
| C | -1.710044000 | 0.160698000 | 0.000372000  |
| C | -0.242556000 | 0.140547000 | 0.000962000  |
| C | 0.471604000  | 1.271767000 | 0.000859000  |
| C | -0.200322000 | 2.578238000 | 0.000555000  |
| C | -1.759106000 | 2.580820000 | -0.004062000 |
| C | -2.439713000 | 1.285382000 | -0.001864000 |
| H | -3.522002000 | 1.278629000 | -0.002747000 |
| O | 0.392854000  | 3.630195000 | 0.003905000  |

|    |              |              |              |
|----|--------------|--------------|--------------|
| O  | -2.347675000 | 3.637198000  | -0.009231000 |
| H  | 1.554606000  | 1.263569000  | 0.001670000  |
| H  | 0.245553000  | -0.826292000 | 0.001670000  |
| Cl | -2.484282000 | -1.388994000 | 0.002566000  |

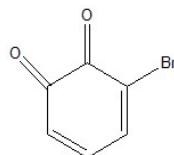

|    |              |              |              |
|----|--------------|--------------|--------------|
| C  | -1.705712000 | 0.154373000  | 0.000540000  |
| C  | -0.242364000 | 0.142822000  | 0.001195000  |
| C  | 0.478598000  | 1.273030000  | 0.000981000  |
| C  | -0.189604000 | 2.592465000  | 0.000924000  |
| C  | -1.756422000 | 2.581397000  | -0.003852000 |
| C  | -2.429590000 | 1.281920000  | -0.001699000 |
| H  | -3.512549000 | 1.277011000  | -0.002806000 |
| O  | 0.389464000  | 3.647146000  | 0.003695000  |
| O  | -2.333493000 | 3.641994000  | -0.009591000 |
| H  | -2.199719000 | -0.809978000 | 0.001618000  |
| H  | 0.251158000  | -0.821330000 | 0.001917000  |
| Br | 2.364279000  | 1.258596000  | 0.001916000  |

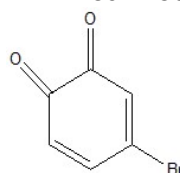

|    |              |              |              |
|----|--------------|--------------|--------------|
| C  | -1.713609000 | 0.142228000  | 0.000562000  |
| C  | -0.245299000 | 0.156410000  | 0.001130000  |
| C  | 0.485183000  | 1.280664000  | 0.001000000  |
| C  | -0.193529000 | 2.579270000  | 0.000583000  |
| C  | -1.751626000 | 2.580870000  | -0.004079000 |
| C  | -2.424946000 | 1.275837000  | -0.001680000 |
| H  | -3.508090000 | 1.269214000  | -0.002504000 |
| O  | 0.399179000  | 3.633196000  | 0.003603000  |
| O  | -2.342371000 | 3.634371000  | -0.009636000 |
| H  | 1.567539000  | 1.279475000  | 0.001867000  |
| Br | 0.597122000  | -1.531346000 | 0.002280000  |
| H  | -2.209254000 | -0.820550000 | 0.001891000  |

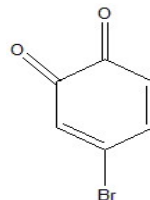

|   |              |             |              |
|---|--------------|-------------|--------------|
| C | -1.711290000 | 0.157803000 | 0.000390000  |
| C | -0.242981000 | 0.140425000 | 0.000911000  |
| C | 0.470788000  | 1.272481000 | 0.000899000  |
| C | -0.199707000 | 2.578897000 | 0.001010000  |
| C | -1.757755000 | 2.580877000 | -0.004079000 |
| C | -2.439285000 | 1.283687000 | -0.001839000 |
| H | -3.521679000 | 1.284790000 | -0.002765000 |
| O | 0.393452000  | 3.631116000 | 0.003910000  |

|    |              |              |              |
|----|--------------|--------------|--------------|
| O  | -2.348135000 | 3.636050000  | -0.009500000 |
| H  | 1.553889000  | 1.263711000  | 0.001591000  |
| H  | 0.250532000  | -0.823463000 | 0.001438000  |
| Br | -2.557423000 | -1.528058000 | 0.002800000  |
